# Supplementary material
Source: publisher site journal article supplement (https://www.spandidos-publications.com/7367/downloadSupplementary)
Supplement: Supplementary file 1 [file downloadSupplementary]

## Sheet: Table SI
Table SI. Clinical and pathological information of 535 patients with lung adenocarcinoma.
ID	Follow-up time, days	Follow-up status	Age, years	Sex	Grade	Stage	T stage	M stage	N stage
TCGA-86-8281	0	0	75	Male	Unknown	IA	T1	M0	NX
TCGA-05-4244	0	0	70	Male	Unknown	IV	T2	M1	N2
TCGA-05-4410	0	0	62	Male	Unknown	IB	T2	M0	N0
TCGA-05-4395	0	1	76	Male	Unknown	IIIB	T4	M0	N2
TCGA-95-7043	2	0	63	Female	Unknown	IA	T1a	MX	N0
TCGA-NJ-A4YI	4	1	87	Female	Unknown	IIIA	T2	M0	N2
TCGA-NJ-A55A	8	0	76	Female	Unknown	IB	T2	M0	N0
TCGA-55-8506	11	0	62	Female	Unknown	IIB	T3	MX	N0
TCGA-NJ-A55O	13	0	56	Female	Unknown	IIA	T1b	M0	N1
TCGA-35-3615	14	0	57	Male	Unknown	IB	T2	M0	N0
TCGA-97-7938	18	1	76	Female	Unknown	IA	T1a	MX	N0
TCGA-86-8672	19	1	59	Male	Unknown	IIB	T3	M0	N0
TCGA-95-7944	21	0	71	Male	Unknown	IA	T1a	M0	N0
TCGA-50-6673	22	1	84	Female	Unknown	I	T1	M0	N0
TCGA-86-8074	24	0	62	Female	Unknown	IIA	T1b	M0	N1
TCGA-95-8039	27	0	72	Male	Unknown	IA	T1	MX	N0
TCGA-55-A493	28	0	54	Female	Unknown	IB	T2a	M0	N0
TCGA-93-A4JO	33	1	70	Male	Unknown	IA	T1a	MX	N0
TCGA-95-7039	34	0	54	Female	Unknown	IIB	T3	MX	N0
TCGA-91-6849	35	0	75	Female	Unknown	IIIA	T2	MX	N2
TCGA-91-8499	36	0	76	Female	Unknown	IA	T1b	MX	N0
TCGA-73-4677	38	1	74	Male	Unknown	Unknown	T2a	M0	N0
TCGA-95-7947	40	0	67	Male	Unknown	IA	T1a	M0	N0
TCGA-73-4675	40	0	59	Male	Unknown	IIIA	T3	M0	N1
TCGA-91-A4BC	44	0	59	Male	Unknown	IIA	T2b	MX	N0
TCGA-99-8032	44	0	61	Male	Unknown	IA	T1a	M0	N0
TCGA-55-8616	48	0	58	Female	Unknown	IB	T2a	M0	N0
TCGA-NJ-A4YP	50	0	52	Male	Unknown	IB	T2a	M0	N0
TCGA-L9-A5IP	58	1	40	Female	Unknown	IV	T3	M1b	N2
TCGA-91-6830	60	0	65	Female	Unknown	IIA	T1	MX	N1
TCGA-67-3776	61	0	57	Female	Unknown	IIB	T2	M0	N1
TCGA-64-5775	62	1	71	Male	Unknown	IIIA	T4	M0	N0
TCGA-05-5715	62	0	69	Female	Unknown	IB	T2a	M0	N0
TCGA-MP-A4TC	74	1	77	Male	Unknown	IIIA	T1	M0	N2
TCGA-91-6835	79	0	81	Female	Unknown	IA	T1	M0	N0
TCGA-95-8494	84	0	67	Male	Unknown	IIA	T2a	M0	N1
TCGA-MN-A4N5	84	0	63	Male	Unknown	IA	T1a	M0	N0
TCGA-95-7562	87	1	71	Male	Unknown	IIA	T2a	M0	N1
TCGA-69-7979	89	0	71	Female	Unknown	IB	T2a	MX	N0
TCGA-05-4415	91	1	57	Male	Unknown	IIIB	T4	M0	N2
TCGA-44-2666	97	1	43	Male	Unknown	IB	T2	M0	N0
TCGA-55-A490	99	1	78	Male	Unknown	IIA	T2b	MX	N0
TCGA-86-A4D0	116	1	48	Male	Unknown	IIA	T2b	M0	N0
TCGA-55-6975	118	1	61	Male	Unknown	IIB	T2	M0	N1
TCGA-50-6591	119	1	63	Female	Unknown	IV	T2	M1	N0
TCGA-55-7727	119	0	70	Male	Unknown	IIIA	T1a	MX	N2
TCGA-05-4250	121	1	79	Female	Unknown	IIIA	T3	M0	N1
TCGA-86-8055	124	1	79	Male	Unknown	IIA	T2a	M0	N1
TCGA-93-7348	127	0	75	Female	Unknown	IA	T1a	MX	N0
TCGA-69-8255	129	0	71	Male	Unknown	IA	T1a	M0	N0
TCGA-73-4670	131	0	69	Female	Unknown	IV	T2	M1	N0
TCGA-95-7948	133	0	42	Female	Unknown	IB	T2a	M0	N0
TCGA-38-A44F	133	0	80	Male	Unknown	IB	T2a	M0	N0
TCGA-69-7978	134	0	59	Male	Unknown	IIB	T2b	MX	N1
TCGA-86-8056	139	0	63	Female	Unknown	IIIA	T4	M0	N0
TCGA-62-8394	139	1	65	Female	Unknown	IIIB	T4	M0	N2
TCGA-67-6216	141	0	57	Female	Unknown	IA	T1a	M0	N0
TCGA-05-5423	151	0	65	Male	Unknown	IIB	T2	M0	N1
TCGA-55-8092	154	1	75	Male	Unknown	IIB	T3	MX	N0
TCGA-MP-A4T8	161	1	68	Male	Unknown	IIIA	T2	M0	N2
TCGA-95-7567	163	0	61	Male	Unknown	IIB	T2b	M0	N1
TCGA-73-4676	164	0	45	Male	Unknown	IIA	T2a	M0	N1
TCGA-97-8174	164	1	67	Male	Unknown	IIA	T2b	M0	N0
TCGA-69-7765	165	0	56	Male	Unknown	Unknown	T4	MX	N0
TCGA-MP-A4T7	167	1	75	Female	Unknown	IV	T2	M1	N0
TCGA-55-6712	171	1	71	Male	Unknown	IIA	T2a	MX	N1
TCGA-78-7146	173	1	71	Female	Unknown	IIIA	T2	M0	N2
TCGA-67-6215	174	0	52	Female	Unknown	IB	T2a	M0	N0
TCGA-55-6978	176	1	81	Male	Unknown	IIA	T2b	MX	N0
TCGA-78-7158	179	1	59	Female	Unknown	IIIB	T4	M0	N2
TCGA-86-6851	179	0	73	Female	Unknown	IIA	T1b	M0	N1
TCGA-35-4123	182	0	38	Male	Unknown	IA	T1	M0	N0
TCGA-69-7974	184	0	54	Female	Unknown	IIIA	T2a	MX	N2
TCGA-69-7761	186	0	84	Male	Unknown	IB	T2a	MX	N0
TCGA-93-8067	186	0	77	Male	Unknown	IB	T2a	MX	N0
TCGA-55-7914	187	1	71	Female	Unknown	IIA	T1b	MX	N1
TCGA-50-6595	189	1	74	Female	Unknown	IIIA	T2	M0	N2
TCGA-44-3919	190	0	71	Female	Unknown	IA	T1	M0	N0
TCGA-L9-A443	193	1	63	Female	Unknown	IA	T1a	MX	N0
TCGA-44-3918	197	0	60	Female	Unknown	IA	T1	M0	N0
TCGA-69-7760	202	0	73	Male	Unknown	IIB	T3	M0	N0
TCGA-71-8520	210	1	60	Female	Unknown	IB	T2	M0	N0
TCGA-78-7161	215	0	69	Female	Unknown	IIB	T3	M0	N0
TCGA-44-7662	218	0	61	Male	Unknown	IB	T2a	MX	N0
TCGA-91-6848	224	0	59	Male	Unknown	IIIA	T2	MX	N2
TCGA-64-5815	224	0	74	Male	Unknown	IIB	T2	M0	N1
TCGA-35-4122	225	0	69	Male	Unknown	IA	T1	M0	N0
TCGA-69-7973	230	0	42	Female	Unknown	IB	T2a	M0	N0
TCGA-55-6979	237	1	59	Female	Unknown	IIB	T2	M0	N1
TCGA-55-7284	243	1	74	Male	Unknown	IIB	T3	MX	N0
TCGA-05-4402	244	1	57	Female	Unknown	IV	T2	M1	NX
TCGA-78-7536	244	1	69	Male	Unknown	IIIA	T2	M0	N2
TCGA-44-2668	246	0	51	Male	Unknown	IB	T2	M0	N0
TCGA-50-5072	250	1	74	Male	Unknown	IIIA	T2	M0	N2
TCGA-44-3398	253	0	77	Female	Unknown	IA	T1b	M0	N0
TCGA-4B-A93V	254	0	52	Female	Unknown	IA	T1b	M0	N0
TCGA-71-6725	256	0	48	Female	Unknown	IB	T2	M0	N0
TCGA-50-5936	257	1	58	Male	Unknown	IIIA	T2	M0	N2
TCGA-78-7166	258	1	84	Male	Unknown	IIB	T2	M0	N1
TCGA-44-8120	260	0	58	Male	Unknown	IB	T2a	M0	N0
TCGA-49-AAR9	260	1	61	Male	Unknown	IIB	T3	MX	N0
TCGA-35-5375	264	0	61	Male	Unknown	IIIA	T2	M0	N2
TCGA-49-4507	268	1	73	Female	Unknown	IIIA	T3	M0	N1
TCGA-05-4418	274	1	69	Male	Unknown	IIIA	T3	M0	N2
TCGA-05-5429	275	1	60	Male	Unknown	IIIA	T3	M0	N2
TCGA-50-5930	282	1	47	Male	Unknown	IIIA	T2	M0	N2
TCGA-44-8119	285	0	73	Male	Unknown	IIB	T3	M0	N0
TCGA-44-A47B	287	0	79	Male	Unknown	IB	T2a	M0	N0
TCGA-93-7347	297	0	76	Female	Unknown	IA	T1a	MX	N0
TCGA-44-6146	302	0	64	Male	Unknown	IIB	T3	M0	N0
TCGA-05-4396	303	1	76	Male	Unknown	IIIB	T4	M0	N1
TCGA-MP-A4TD	307	1	71	Male	Unknown	IIIA	T2	M0	N2
TCGA-L9-A444	307	0	60	Female	Unknown	IA	T1a	MX	N0
TCGA-50-7109	308	1	60	Male	Unknown	IA	T1	M0	N0
TCGA-91-6831	310	0	66	Male	Unknown	IB	T2	MX	N0
TCGA-78-7542	321	1	56	Male	Unknown	IB	T2	M0	N0
TCGA-78-8660	321	1	69	Male	Unknown	IIB	T2	M0	N1
TCGA-91-6828	323	0	70	Male	Unknown	IA	T1a	M0	N0
TCGA-44-7660	325	0	72	Male	Unknown	IB	T2	MX	N0
TCGA-78-7539	327	0	75	Female	Unknown	IIA	T2b	M0	N0
TCGA-44-6145	328	0	62	Female	Unknown	IA	T1	M0	N0
TCGA-MP-A4TF	336	1	58	Female	Unknown	IIA	T2b	M0	N0
TCGA-50-6593	336	1	49	Female	Unknown	IIIA	T1	M0	N2
TCGA-44-A47F	337	0	74	Male	Unknown	IIB	T2b	M0	N1
TCGA-MP-A4TJ	339	1	62	Female	Unknown	IA	T1	M0	N0
TCGA-73-A9RS	340	1	41	Male	Unknown	IIB	T3	M0	N0
TCGA-55-7907	343	1	77	Male	Unknown	IIA	T2a	MX	N1
TCGA-44-A47G	351	0	73	Female	Unknown	IA	T1	M0	N0
TCGA-86-8585	353	0	57	Male	Unknown	IB	T2a	M0	N0
TCGA-49-6761	354	0	68	Female	Unknown	IIIA	T1	MX	N2
TCGA-38-4631	354	1	72	Female	Unknown	IB	T2	M0	N0
TCGA-44-6774	361	0	56	Female	Unknown	IIIA	T1	M0	N2
TCGA-44-6148	362	0	60	Male	Unknown	IA	T1b	M0	N0
TCGA-05-4422	365	0	68	Male	Unknown	IB	T2	M0	N0
TCGA-44-7661	366	0	69	Female	Unknown	IB	T2a	M0	N0
TCGA-49-6743	369	0	81	Female	Unknown	IIIA	T1	MX	N2
TCGA-50-6594	370	1	79	Female	Unknown	IIIA	T3	M0	N2
TCGA-44-4112	370	0	60	Female	Unknown	IB	T2a	M0	N0
TCGA-44-6775	370	0	72	Female	Unknown	IB	T2a	MX	N0
TCGA-91-6840	372	0	59	Female	Unknown	IA	T1b	M0	N0
TCGA-55-8620	375	1	60	Male	Unknown	IV	T1a	M1b	N1
TCGA-86-6562	376	1	52	Male	Unknown	IIA	T2a	M0	N1
TCGA-44-5645	383	0	61	Female	Unknown	IA	T1	Unknown	NX
TCGA-44-2664	383	0	66	Female	Unknown	IA	T1	M0	N0
TCGA-49-4490	385	1	45	Female	Unknown	IIIA	T3	M0	N2
TCGA-67-3774	385	0	73	Female	Unknown	IB	T2	M0	N0
TCGA-44-8117	385	0	54	Female	Unknown	IB	T2a	M0	N0
TCGA-44-A479	392	0	73	Female	Unknown	IB	T2	MX	N0
TCGA-99-7458	392	0	74	Female	Unknown	IIIA	T4	M0	N0
TCGA-44-3917	392	0	33	Female	Unknown	IB	T2	M0	N0
TCGA-44-2657	400	0	74	Female	Unknown	IB	T2	M0	NX
TCGA-44-2665	400	0	55	Female	Unknown	IIB	T2	M0	N1
TCGA-86-8674	405	0	50	Male	Unknown	IIA	T2a	M0	N1
TCGA-86-A456	405	0	78	Female	Unknown	IA	T1a	M0	N0
TCGA-44-6144	407	0	58	Male	Unknown	IA	T1a	M0	N0
TCGA-69-8254	409	0	85	Male	Unknown	Unknown	T2b	Unknown	Unknown
TCGA-44-A4SU	409	1	67	Female	Unknown	IA	T1a	MX	N0
TCGA-44-3396	411	0	74	Female	Unknown	IIIA	T2	M0	N2
TCGA-69-7980	411	0	70	Female	Unknown	I	T1b	M0	N0
TCGA-69-7764	414	0	75	Male	Unknown	IA	T1b	M0	N0
TCGA-62-A46Y	414	1	70	Female	Unknown	IIIA	T2	M0	N2
TCGA-44-A4SS	415	0	73	Male	Unknown	IA	T1b	M0	N0
TCGA-86-A4P7	415	0	63	Female	Unknown	IB	T2a	M0	N0
TCGA-55-8619	416	0	72	Female	Unknown	IIB	T3	MX	N0
TCGA-91-6836	417	0	52	Female	Unknown	IB	T2	MX	N0
TCGA-44-5643	417	0	53	Male	Unknown	IIIA	T2b	M0	N2
TCGA-55-8507	418	0	53	Male	Unknown	IA	T1a	MX	N0
TCGA-44-7672	418	0	52	Female	Unknown	IA	T1b	M0	N0
TCGA-86-7713	422	0	70	Male	Unknown	IIA	T2b	M0	N0
TCGA-67-6217	422	0	73	Female	Unknown	IIA	T2a	M0	N1
TCGA-86-8668	423	0	61	Female	Unknown	IA	T1b	M0	N0
TCGA-53-7813	424	0	51	Female	Unknown	IIIB	T4	M0	N0
TCGA-05-4384	426	0	66	Male	Unknown	IIIA	T2	M0	N2
TCGA-69-8253	426	0	59	Female	Unknown	IIA	T1a	MX	N1
TCGA-67-3773	427	0	84	Female	Unknown	IB	T2	M0	N0
TCGA-49-4505	428	1	61	Female	Unknown	IIB	T2	M0	N1
TCGA-MP-A4TI	429	1	72	Male	Unknown	IIA	T2a	M0	N1
TCGA-86-A4P8	431	0	59	Female	Unknown	IIIA	T1b	MX	N2
TCGA-91-8497	434	1	75	Female	Unknown	IA	T1a	MX	N0
TCGA-50-5931	434	1	75	Female	Unknown	IB	T2	M0	N0
TCGA-55-6543	435	0	60	Female	Unknown	IA	T1b	MX	N0
TCGA-97-8179	435	0	72	Male	Unknown	IA	T1a	M0	N0
TCGA-L4-A4E6	435	0	67	Male	Unknown	IA	T1	M0	N0
TCGA-55-A4DF	440	1	88	Male	Unknown	IA	T1b	MX	N0
TCGA-55-8505	440	0	62	Male	Unknown	IIIA	T1a	MX	N2
TCGA-44-6147	441	0	67	Female	Unknown	IA	T1b	M0	NX
TCGA-55-7725	442	0	68	Female	Unknown	IA	T1a	MX	N0
TCGA-L9-A50W	442	1	75	Male	Unknown	IIA	T1b	MX	N1
TCGA-86-8359	444	1	52	Male	Unknown	IIIA	T3	M0	N2
TCGA-44-7659	444	0	70	Male	Unknown	IA	T1b	MX	N0
TCGA-62-8398	444	1	55	Male	Unknown	IIIA	T2	M0	N2
TCGA-49-6742	445	0	70	Male	Unknown	IIA	T2a	M0	N1
TCGA-44-2661	446	0	69	Female	Unknown	IA	T1	M0	N0
TCGA-MP-A4TH	446	0	70	Female	Unknown	IA	T1a	M0	N0
TCGA-55-8615	446	0	67	Male	Unknown	IIIA	T3	MX	N2
TCGA-38-6178	448	0	70	Female	Unknown	IIIA	T2b	Unknown	N2
TCGA-67-4679	448	0	69	Male	Unknown	Unknown	T3	M0	N0
TCGA-05-4417	455	0	51	Female	Unknown	IB	T2	M0	N0
TCGA-86-8673	455	0	61	Male	Unknown	IB	T2	M0	N0
TCGA-05-5420	457	0	67	Male	Unknown	IIIA	T2	M0	N2
TCGA-05-4434	457	1	67	Female	Unknown	IV	T4	M1	N1
TCGA-50-5939	460	1	85	Male	Unknown	IB	T2	M0	N0
TCGA-55-8087	462	0	59	Female	Unknown	IB	T2a	MX	N0
TCGA-55-6970	464	1	67	Female	Unknown	IIIA	T2	MX	N2
TCGA-44-A47A	466	0	78	Female	Unknown	IB	T2a	MX	N0
TCGA-73-4668	467	0	66	Female	Unknown	IIB	T2	M0	N1
TCGA-97-8176	468	1	63	Male	Unknown	IIIA	T3	M0	N1
TCGA-55-7816	468	1	49	Female	Unknown	IV	TX	MX	NX
TCGA-55-8299	469	1	61	Female	Unknown	IA	T1b	MX	N0
TCGA-86-7701	474	0	66	Male	Unknown	IV	T2	M1	N0
TCGA-86-8278	476	0	63	Female	Unknown	IIB	T2	M0	N1
TCGA-55-8097	476	0	60	Female	Unknown	IA	T1a	MX	N0
TCGA-L9-A8F4	476	0	64	Female	Unknown	IB	T2a	MX	N0
TCGA-50-5051	478	1	42	Female	Unknown	IIIA	T2	M0	N2
TCGA-55-8302	478	0	54	Male	Unknown	IB	T2	MX	N0
TCGA-86-8075	479	0	66	Female	Unknown	IB	T2	M0	N0
TCGA-44-2662	480	0	65	Male	Unknown	IB	T2	M0	N0
TCGA-55-A494	481	0	61	Female	Unknown	IB	T2a	MX	N0
TCGA-86-8279	482	0	46	Male	Unknown	IIA	T2a	M0	N1
TCGA-97-7941	484	0	72	Female	Unknown	IA	T1b	MX	N0
TCGA-55-7573	487	0	72	Female	Unknown	IA	T1b	MX	N0
TCGA-86-8076	489	0	42	Male	Unknown	IA	T1	M0	N0
TCGA-91-7771	492	0	62	Male	Unknown	IIB	T3	MX	N0
TCGA-44-5644	498	0	51	Female	Unknown	IB	T2a	Unknown	N0
TCGA-97-8177	499	0	59	Female	Unknown	IB	T2a	M0	N0
TCGA-J2-A4AG	500	0	66	Female	Unknown	IA	T1b	MX	N0
TCGA-44-6779	500	1	50	Female	Unknown	IIB	T2	MX	N1
TCGA-91-8496	505	0	63	Female	Unknown	IB	T2a	MX	NX
TCGA-64-5779	507	0	61	Male	Unknown	IIIA	T2	M0	N2
TCGA-86-7955	508	0	62	Male	Unknown	IB	T2a	M0	N0
TCGA-S2-AA1A	513	0	68	Female	Unknown	IA	T1b	M0	N0
TCGA-55-8204	515	0	87	Female	Unknown	IB	T2a	MX	N0
TCGA-55-8621	515	0	75	Female	Unknown	IA	T1a	MX	N0
TCGA-55-8514	520	0	70	Female	Unknown	IB	T2a	MX	N0
TCGA-49-6745	522	0	82	Male	Unknown	IIIA	T2a	M0	N2
TCGA-93-A4JQ	526	0	49	Male	Unknown	IA	T1b	MX	N0
TCGA-44-2659	529	0	65	Female	Unknown	IIB	T1	M0	N1
TCGA-44-7670	531	0	47	Female	Unknown	IIA	T1b	M0	N1
TCGA-55-8301	534	0	58	Male	Unknown	IB	T2a	MX	N0
TCGA-44-7671	535	0	64	Male	Unknown	IB	T2a	M0	N0
TCGA-86-A4JF	536	0	56	Male	Unknown	IIB	T3	M0	N0
TCGA-55-8614	536	0	76	Male	Unknown	IB	T2a	MX	N0
TCGA-55-7911	537	0	70	Female	Unknown	IA	T1a	MX	N0
TCGA-55-8510	539	0	55	Female	Unknown	IB	T2a	MX	N0
TCGA-97-A4M3	540	0	69	Female	Unknown	IA	T1b	M0	N0
TCGA-55-8094	541	0	51	Male	Unknown	IV	T2b	M1b	N0
TCGA-97-8172	545	0	75	Female	Unknown	IB	T2a	M0	N0
TCGA-55-A57B	546	0	80	Female	Unknown	IA	T1b	M0	N0
TCGA-55-8203	547	0	69	Female	Unknown	IA	T1b	M0	N0
TCGA-J2-A4AD	550	1	61	Female	Unknown	IA	T1a	MX	N0
TCGA-69-8453	550	0	77	Male	Unknown	IIB	T3	MX	N0
TCGA-97-8175	551	0	55	Female	Unknown	IB	T2a	M0	N0
TCGA-55-8511	552	0	73	Female	Unknown	IB	T2a	MX	N0
TCGA-95-A4VN	553	0	62	Female	Unknown	IIA	T2a	M0	N1
TCGA-44-7667	557	0	49	Female	Unknown	IIB	T3	MX	N0
TCGA-55-7913	561	1	61	Female	Unknown	IA	T1b	MX	N0
TCGA-97-7937	564	0	65	Male	Unknown	IB	T2a	MX	N0
TCGA-L9-A7SV	565	0	69	Male	Unknown	IIA	T2a	M0	N1
TCGA-55-7903	567	0	64	Male	Unknown	IA	T1b	MX	N0
TCGA-50-5941	567	0	55	Female	Unknown	IIIA	T2a	M0	N2
TCGA-97-8171	568	0	81	Male	Unknown	IV	T2a	M1a	N2
TCGA-97-A4M6	568	0	45	Female	Unknown	IA	T1a	M0	N0
TCGA-67-3772	573	0	82	Female	Unknown	IB	T2	M0	N0
TCGA-44-7669	574	1	59	Male	Unknown	IIA	T1b	MX	N1
TCGA-44-2655	575	0	65	Female	Unknown	IA	T1	M0	N0
TCGA-L4-A4E5	578	0	48	Female	Unknown	I	T1	M0	N0
TCGA-05-4403	578	0	76	Male	Unknown	IB	T2	M0	N0
TCGA-93-A4JP	578	0	64	Male	Unknown	IV	TX	M1b	NX
TCGA-MP-A4TK	582	1	56	Female	Unknown	IIB	T2	MX	N1
TCGA-44-2656	582	0	59	Male	Unknown	IB	T2	M0	N0
TCGA-78-7147	586	1	67	Female	Unknown	IIB	T2	M0	N1
TCGA-50-8459	589	0	68	Male	Unknown	IIB	T3	M0	N0
TCGA-86-7953	591	0	69	Female	Unknown	IA	T1b	M0	N0
TCGA-69-A59K	591	0	60	Female	Unknown	IIB	T3	M0	N0
TCGA-78-7154	593	1	72	Male	Unknown	IIIA	T3	M0	N2
TCGA-62-A46P	594	1	65	Male	Unknown	IB	T2	M0	N0
TCGA-55-A492	596	0	70	Female	Unknown	IA	T1a	MX	N0
TCGA-55-8090	598	1	80	Male	Unknown	IA	T1a	M0	N0
TCGA-55-8205	599	0	76	Female	Unknown	IIA	T2b	M0	N0
TCGA-55-8091	600	0	74	Male	Unknown	IB	T2	MX	N0
TCGA-97-A4M1	601	0	52	Female	Unknown	IA	T1a	M0	N0
TCGA-NJ-A55R	603	0	67	Male	Unknown	IA	T1b	MX	N0
TCGA-91-A4BD	603	0	78	Male	Unknown	IIA	T1b	MX	N1
TCGA-55-7994	603	0	81	Male	Unknown	IIB	T3	MX	N0
TCGA-86-7954	605	0	68	Female	Unknown	IB	T2	M0	N0
TCGA-95-A4VP	605	0	66	Female	Unknown	IIIA	T2b	M0	N2
TCGA-05-4382	607	0	68	Male	Unknown	IB	T2	M0	N0
TCGA-55-8512	607	1	41	Male	Unknown	IV	T1a	M1b	N1
TCGA-55-A4DG	608	0	71	Male	Unknown	IA	T1b	MX	N0
TCGA-55-7283	609	0	76	Female	Unknown	IIIA	T3	MX	N2
TCGA-05-4405	610	0	74	Female	Unknown	IB	T2	M0	N0
TCGA-67-3771	610	0	77	Female	Unknown	IA	T1	M0	N0
TCGA-67-3770	610	0	70	Female	Unknown	IA	T1	M0	N0
TCGA-97-A4LX	614	0	81	Male	Unknown	IB	T2a	M0	N0
TCGA-NJ-A7XG	617	0	49	Male	Unknown	IIIA	T4	M0	N1
TCGA-55-8508	617	0	60	Female	Unknown	IIA	T2a	MX	N1
TCGA-50-5044	624	1	72	Female	Unknown	IIIB	T4	M0	N1
TCGA-97-A4M2	624	0	66	Male	Unknown	IA	T1a	M0	N0
TCGA-86-7714	625	1	61	Female	Unknown	IIIA	T1b	M0	N2
TCGA-55-A491	626	0	81	Female	Unknown	IA	T1b	MX	N0
TCGA-78-7148	626	1	71	Male	Unknown	IIB	T2	M0	N1
TCGA-97-8552	626	0	55	Female	Unknown	I	T1a	MX	N0
TCGA-64-1677	628	1	77	Female	Unknown	IIIA	T2	M0	N2
TCGA-97-A4M7	629	0	74	Male	Unknown	IA	T1b	M0	N0
TCGA-55-A48Y	630	0	69	Male	Unknown	IIA	T2b	M0	N0
TCGA-86-7711	630	0	70	Male	Unknown	IIA	T2a	M0	N1
TCGA-97-A4M5	634	0	83	Male	Unknown	IA	T1b	M0	N0
TCGA-55-A48Z	651	0	60	Female	Unknown	IIIB	T1a	MX	N3
TCGA-95-A4VK	651	0	74	Female	Unknown	IIIA	T2b	M0	N2
TCGA-97-A4M0	652	0	60	Female	Unknown	IB	T2a	M0	N0
TCGA-55-7726	652	0	72	Female	Unknown	IA	T1b	MX	N0
TCGA-50-5935	653	1	86	Female	Unknown	IA	T1	M0	N0
TCGA-86-8358	653	0	44	Male	Unknown	IB	T2a	M0	N0
TCGA-99-8033	656	1	74	Female	Unknown	IV	TX	M1	NX
TCGA-97-8547	657	0	78	Female	Unknown	IIIA	T2a	MX	N2
TCGA-99-AA5R	658	0	70	Female	Unknown	IA	T1a	M0	N0
TCGA-L9-A743	664	0	56	Male	Unknown	IIA	T2a	M0	N1
TCGA-78-7150	666	1	59	Male	Unknown	IIB	T2	M0	N1
TCGA-05-4425	669	0	70	Female	Unknown	IV	T2	M1	N0
TCGA-55-7576	670	0	54	Male	Unknown	IB	T2a	M0	N0
TCGA-05-5428	670	0	57	Male	Unknown	IIA	T1b	M0	N1
TCGA-J2-A4AE	671	0	77	Female	Unknown	IA	T1a	MX	N0
TCGA-55-8208	674	0	73	Female	Unknown	IA	T1b	M0	N0
TCGA-49-6767	677	0	46	Female	Unknown	IIB	T3	MX	N0
TCGA-49-AAQV	677	1	63	Female	Unknown	II	T1	MX	N1
TCGA-78-7160	678	0	61	Male	Unknown	IV	T4	M1	N2
TCGA-50-5946	686	0	62	Male	Unknown	IA	T1	MX	N0
TCGA-55-A48X	689	0	63	Female	Unknown	IIA	T1b	M0	N1
TCGA-69-7763	690	0	69	Male	Unknown	IA	T1b	M0	N0
TCGA-86-8280	701	0	54	Female	Unknown	IIA	T2b	M0	N0
TCGA-55-1592	701	1	65	Male	Unknown	IA	T2	M0	N0
TCGA-55-8089	702	1	56	Male	Unknown	IA	T1a	M0	N0
TCGA-55-7728	704	0	64	Female	Unknown	IB	T2a	MX	N0
TCGA-55-7724	705	0	76	Female	Unknown	IB	T2a	MX	N0
TCGA-73-4659	711	1	66	Male	Unknown	IIIA	T2	M0	N2
TCGA-73-7499	715	0	81	Female	Unknown	IB	T2a	M0	N0
TCGA-93-A4JN	718	0	71	Male	Unknown	IV	T2a	M1a	N0
TCGA-55-8096	719	1	67	Female	Unknown	IB	T2a	MX	N0
TCGA-J2-8194	724	0	69	Female	Unknown	IIB	T3	MX	N0
TCGA-05-4433	730	0	82	Male	Unknown	IB	T2	M0	N0
TCGA-05-4245	730	0	81	Male	Unknown	IIIA	T2	M0	N2
TCGA-05-4397	731	1	65	Male	Unknown	IIB	T2	M0	N1
TCGA-J2-8192	739	0	65	Female	Unknown	IIA	T2a	MX	N1
TCGA-86-8073	740	0	58	Male	Unknown	IB	T2a	M0	N0
TCGA-86-8054	745	0	61	Male	Unknown	IIB	T2b	M0	N1
TCGA-78-7153	760	0	65	Female	Unknown	IB	T2	M0	N0
TCGA-55-6984	760	1	71	Female	Unknown	IIB	T2	M0	N1
TCGA-05-4430	761	0	59	Female	Unknown	IB	T2	M0	N0
TCGA-05-4432	761	0	66	Male	Unknown	IIB	T2	M0	N1
TCGA-50-5944	764	0	69	Female	Unknown	IA	T1	M0	N0
TCGA-55-7815	773	0	76	Male	Unknown	IB	T2a	MX	N0
TCGA-97-7554	775	0	83	Female	Unknown	IIIA	T2a	M0	N2
TCGA-50-6592	777	1	71	Female	Unknown	IB	T2	M0	N0
TCGA-50-8457	779	0	63	Female	Unknown	IA	T1a	M0	N0
TCGA-05-4427	791	0	65	Female	Unknown	IIB	T2	M0	N1
TCGA-55-8513	791	0	77	Female	Unknown	IIB	T3	MX	N0
TCGA-05-4426	791	0	71	Male	Unknown	IB	T2	M0	N0
TCGA-73-4666	800	0	52	Female	Unknown	IV	T1	M1	N0
TCGA-38-7271	800	1	72	Female	Unknown	IA	T1	M0	N0
TCGA-78-7220	807	1	53	Female	Unknown	IIIA	T2	M0	N2
TCGA-55-7570	824	0	60	Male	Unknown	IA	T1a	MX	N0
TCGA-83-5908	824	0	59	Female	Unknown	IA	T1	M0	N0
TCGA-78-7145	826	1	52	Female	Unknown	IV	T4	M1	N1
TCGA-MN-A4N1	827	0	60	Male	Unknown	IIA	T2a	M0	N1
TCGA-50-8460	829	0	74	Male	Unknown	IA	T1a	M0	N0
TCGA-86-8671	839	0	72	Female	Unknown	IIB	T2b	M0	N1
TCGA-91-6847	842	0	62	Female	Unknown	IB	T2	MX	N0
TCGA-49-4487	855	1	72	Female	Unknown	IA	T1	M0	N0
TCGA-38-4629	864	1	68	Male	Unknown	IIB	T3	M0	N0
TCGA-49-4488	869	1	74	Female	Unknown	IA	T1	MX	N0
TCGA-55-7281	872	0	70	Female	Unknown	IA	T1b	M0	N0
TCGA-49-AAR4	879	1	51	Male	Unknown	IIIA	T2	MX	N2
TCGA-78-7540	881	0	66	Female	Unknown	IB	T2	M0	N0
TCGA-05-5425	882	0	68	Male	Unknown	IIB	T2b	M0	N1
TCGA-50-5942	883	0	67	Female	Unknown	IA	T1	M0	N0
TCGA-NJ-A4YQ	886	0	69	Female	Unknown	IA	T1b	M0	N0
TCGA-55-8206	888	0	56	Male	Unknown	IA	T1b	M0	N0
TCGA-55-7995	889	0	73	Female	Unknown	IA	T1b	M0	N0
TCGA-49-6744	890	0	64	Female	Unknown	IIA	T2a	MX	N1
TCGA-49-4510	896	1	51	Female	Unknown	IIB	T2	M0	N1
TCGA-MP-A4TE	896	1	56	Male	Unknown	IIA	T2b	MX	N0
TCGA-55-8085	904	0	64	Male	Unknown	IA	T1b	M0	N0
TCGA-49-4512	905	1	69	Female	Unknown	IIIA	T2	MX	N2
TCGA-62-A472	910	0	70	Male	Unknown	IIB	T3	M0	N0
TCGA-73-4662	912	0	65	Female	Unknown	IA	T1	M0	N0
TCGA-05-4420	912	0	41	Male	Unknown	IB	T2	M0	N0
TCGA-05-4424	913	0	70	Male	Unknown	IIB	T3	M0	N0
TCGA-64-5778	926	0	60	Male	Unknown	IB	T2	M0	N0
TCGA-53-7626	929	1	76	Female	Unknown	IIA	T1	M0	N1
TCGA-55-5899	930	0	58	Male	Unknown	Unknown	T1a	M0	N1
TCGA-86-8669	938	0	64	Male	Unknown	IA	T1b	M0	N0
TCGA-50-5066	944	0	72	Male	Unknown	IB	T2	M0	N0
TCGA-78-7535	949	1	45	Male	Unknown	IB	T2	M0	N0
TCGA-MP-A4TA	950	1	75	Female	Unknown	IA	T1	M0	N0
TCGA-55-7227	952	1	77	Male	Unknown	IIIA	T3	MX	N1
TCGA-78-7156	976	1	62	Male	Unknown	IV	T4	M1	N1
TCGA-55-8207	977	0	73	Male	Unknown	IB	T2a	MX	N0
TCGA-44-6777	987	1	85	Female	Unknown	IB	T2	MX	NX
TCGA-78-7633	994	0	67	Male	Unknown	IB	T2	M0	N0
TCGA-55-7574	995	1	64	Female	Unknown	IB	T2a	M0	N0
TCGA-55-6982	995	1	79	Female	Unknown	IIB	T2	M0	N1
TCGA-49-4506	999	1	68	Female	Unknown	IIB	T2	M0	N1
TCGA-55-7910	1040	0	50	Female	Unknown	IIA	T2b	M0	N0
TCGA-53-7624	1043	1	40	Female	Unknown	IV	T2	M1	N0
TCGA-99-8025	1060	0	72	Female	Unknown	IIIA	T3	M0	N2
TCGA-53-A4EZ	1071	0	63	Male	Unknown	IIA	T2a	MX	N1
TCGA-38-4630	1073	1	75	Female	Unknown	IB	T2	M0	N0
TCGA-49-4494	1081	1	77	Male	Unknown	IIIA	T3	M0	N2
TCGA-78-7149	1093	0	71	Male	Unknown	IIIB	T4	M0	N0
TCGA-44-6778	1110	0	59	Male	Unknown	IA	T1	MX	N0
TCGA-99-8028	1118	0	50	Female	Unknown	IA	T1a	M0	N0
TCGA-05-4390	1126	0	58	Female	Unknown	IB	T2	M0	N0
TCGA-64-1680	1126	0	63	Male	Unknown	IV	T2a	M1	N2
TCGA-49-AARN	1135	1	56	Female	Unknown	IA	T1	MX	N0
TCGA-MP-A4T2	1136	1	71	Male	Unknown	IA	T1	M0	N0
TCGA-38-4627	1147	1	64	Female	Unknown	IIA	T1b	M0	N1
TCGA-64-1681	1167	1	61	Female	Unknown	IA	T1	M0	N0
TCGA-78-7155	1171	1	68	Male	Unknown	IB	T2	M0	N0
TCGA-MN-A4N4	1175	0	57	Male	Unknown	IA	T1b	M0	N0
TCGA-55-1594	1178	0	68	Male	Unknown	IIIA	T2	M0	N2
TCGA-64-1678	1189	0	70	Female	Unknown	Unknown	T2b	M0	N0
TCGA-73-7498	1189	0	58	Female	Unknown	IA	T1b	M0	N0
TCGA-62-A470	1194	1	84	Male	Unknown	IB	T2	M0	N0
TCGA-64-5781	1202	0	55	Female	Unknown	IB	T2	M0	N0
TCGA-78-7152	1202	0	65	Male	Unknown	IB	T2	M0	N0
TCGA-78-8648	1209	1	58	Female	Unknown	IIB	T3	M0	N0
TCGA-62-8395	1216	0	80	Female	Unknown	IIB	T3	M0	N0
TCGA-78-7159	1221	0	60	Female	Unknown	IA	T1	M0	NX
TCGA-49-AARE	1229	1	51	Female	Unknown	IA	T1	MX	N0
TCGA-55-6985	1233	0	58	Female	Unknown	IB	T2	MX	N0
TCGA-50-5932	1235	1	75	Male	Unknown	IIB	T2	M0	N1
TCGA-55-6969	1239	0	52	Male	Unknown	IB	T2	M0	N0
TCGA-62-A471	1246	0	64	Male	Unknown	IIB	T2b	M0	N1
TCGA-91-6829	1258	1	78	Male	Unknown	IB	T2	MX	N0
TCGA-MP-A4T9	1265	1	54	Female	Unknown	IIIA	T2	MX	N2
TCGA-50-6597	1268	1	79	Female	Unknown	IB	T2	M0	N0
TCGA-97-7546	1285	0	76	Female	Unknown	IA	T1	MX	N0
TCGA-50-6590	1288	1	72	Female	Unknown	IB	T2	M0	N0
TCGA-62-8397	1289	0	70	Female	Unknown	IIB	T3	M0	N0
TCGA-55-6968	1293	1	61	Male	Unknown	IV	T1	M1	N0
TCGA-38-4632	1357	1	42	Male	Unknown	IV	T2	M1	N1
TCGA-05-4389	1369	0	70	Male	Unknown	IA	T1	M0	N0
TCGA-55-6981	1379	1	53	Female	Unknown	IIIA	T1	M0	N2
TCGA-55-6971	1400	0	59	Female	Unknown	IB	T2	MX	N0
TCGA-49-4501	1421	1	67	Female	Unknown	IB	T2	M0	N0
TCGA-05-4398	1431	0	47	Female	Unknown	IIIB	T4	M0	N3
TCGA-62-A46O	1454	1	65	Female	Unknown	IB	T2	M0	N0
TCGA-55-1595	1479	0	74	Female	Unknown	IA	T1	M0	N0
TCGA-38-4628	1492	1	65	Female	Unknown	IIB	T2	M0	N1
TCGA-62-8402	1498	1	73	Female	Unknown	IIIA	T2	M0	N2
TCGA-50-5068	1499	1	59	Female	Unknown	IIB	T2	MX	N1
TCGA-MP-A4SY	1501	1	61	Male	Unknown	IIB	T2	M0	N1
TCGA-05-4249	1523	0	67	Male	Unknown	IB	T2	M0	N0
TCGA-73-4658	1600	1	80	Female	Unknown	IB	T2	M0	N0
TCGA-78-7537	1622	1	72	Male	Unknown	IB	T2	M0	N0
TCGA-55-6972	1632	1	72	Male	Unknown	IB	T2	M0	N0
TCGA-62-A46S	1653	1	73	Male	Unknown	IB	T2	M0	N0
TCGA-64-1679	1686	0	58	Female	Unknown	IIIA	T1	M0	N2
TCGA-49-4514	1700	0	79	Female	Unknown	IA	T1	M0	N0
TCGA-62-A46R	1725	1	54	Female	Unknown	IB	T2	M0	N0
TCGA-64-1676	1728	0	58	Male	Unknown	IA	T1a	M0	N0
TCGA-MP-A4SW	1778	1	53	Male	Unknown	IIB	T2	M0	N1
TCGA-MP-A4T6	1790	1	76	Female	Unknown	IIIA	T1	MX	N2
TCGA-O1-A52J	1798	1	74	Female	Unknown	IA	T1	MX	N0
TCGA-50-5055	1830	1	79	Female	Unknown	IIA	T1	M0	N1
TCGA-MP-A5C7	1862	0	76	Female	Unknown	IB	T2	M0	N0
TCGA-97-7553	1870	0	58	Female	Unknown	IA	T1	MX	N0
TCGA-49-AAR3	1893	0	69	Male	Unknown	IIB	T2	MX	N1
TCGA-NJ-A4YG	1904	0	65	Male	Unknown	IB	T2	M0	N0
TCGA-97-7552	1932	0	70	Male	Unknown	IB	T2	MX	N0
TCGA-44-6776	1938	0	60	Female	Unknown	IA	T1	MX	N0
TCGA-97-7547	1965	0	67	Female	Unknown	IB	T2	MX	N0
TCGA-55-1596	2065	0	55	Male	Unknown	IIB	T2	M0	N1
TCGA-62-A46U	2067	0	71	Female	Unknown	IIB	T2	M0	N1
TCGA-55-6980	2109	0	56	Male	Unknown	IA	T1	M0	N0
TCGA-55-6987	2137	0	77	Male	Unknown	IA	T1	M0	N0
TCGA-50-5049	2146	0	70	Male	Unknown	IA	T2	M0	N0
TCGA-NJ-A4YF	2161	0	50	Female	Unknown	IA	T1	M0	N0
TCGA-50-5045	2174	1	57	Female	Unknown	Unknown	T2	M0	N1
TCGA-62-A46V	2199	0	78	Female	Unknown	IB	T2	M0	N0
TCGA-49-AAR2	2224	0	64	Male	Unknown	IB	T2	MX	N0
TCGA-49-4486	2318	1	72	Male	Unknown	IA	T1	M0	N0
TCGA-78-8655	2360	0	77	Female	Unknown	IA	T1	M0	N0
TCGA-50-5933	2393	1	72	Male	Unknown	IIIB	T4	M0	N2
TCGA-55-6642	2449	0	63	Male	Unknown	IB	T2	MX	N0
TCGA-64-5774	2550	0	60	Male	Unknown	IB	T2	M0	N0
TCGA-38-4626	2595	0	57	Female	Unknown	Unknown	T2b	M0	N0
TCGA-MP-A4T4	2617	1	68	Female	Unknown	IIB	T2	M0	N1
TCGA-MP-A4SV	2620	1	67	Male	Unknown	IB	T2	M0	N0
TCGA-78-7167	2681	1	77	Male	Unknown	IV	T2	M1	N0
TCGA-62-8399	2696	0	62	Male	Unknown	IIIA	T2	M0	N2
TCGA-55-6983	2823	0	81	Male	Unknown	IIB	T2	M0	N1
TCGA-38-4625	2973	0	66	Female	Unknown	IB	T2a	M0	N0
TCGA-78-7162	3169	1	75	Male	Unknown	IA	T1	M0	N0
TCGA-55-6986	3261	0	74	Female	Unknown	IB	T2	M0	N0
TCGA-78-8662	3361	1	53	Female	Unknown	IB	T2	M0	N0
TCGA-49-AARO	3759	0	39	Female	Unknown	IA	T1a	MX	N0
TCGA-49-AAR0	4655	0	57	Male	Unknown	IA	T1	MX	N0
TCGA-78-7143	4961	1	62	Female	Unknown	IB	T2	M0	N0
TCGA-49-AARR	4992	0	68	Male	Unknown	IA	T1	MX	N0
TCGA-78-8640	6528	0	59	Male	Unknown	IIA	T1	M0	N1
TCGA-49-AARQ	6732	0	41	Female	Unknown	I	T2	MX	N0
TCGA-78-7163	6812	0	60	Male	Unknown	IB	T2	M0	N0
TCGA-75-5126		0	Unknown	Female	Unknown	IIIA	T3	M0	N2
TCGA-80-5608		0	Unknown	Female	Unknown	IA	T1	M0	N0
TCGA-75-5125		0	Unknown	Male	Unknown	IIB	T2	M0	N1
TCGA-75-7030		0	Unknown	Male	Unknown	IIB	T3	M0	N0
TCGA-75-6203		0	Unknown	Female	Unknown	IIIA	T2	M0	N2
TCGA-75-7025		0	Unknown	Male	Unknown	IB	T2	M0	N0
TCGA-75-6205		1	Unknown	Female	Unknown	IB	T2a	M0	N0
TCGA-80-5611		0	Unknown	Male	Unknown	IB	T2	M0	N0
TCGA-75-6206		0	Unknown	Male	Unknown	IB	T2	M0	N0
TCGA-80-5607		0	Unknown	Female	Unknown	IIB	T2	M0	N1
TCGA-75-6207		1	Unknown	Male	Unknown	IIIA	T2	M0	N2
TCGA-75-5147		0	Unknown	Female	Unknown	IB	T2	M0	N0
TCGA-75-7031		0	Unknown	Female	Unknown	IB	T2	M0	N0
TCGA-75-5146		0	Unknown	Male	Unknown	IB	T2	M0	N0
TCGA-75-7027		0	Unknown	Male	Unknown	IB	T2	M0	N0
TCGA-75-6214		0	Unknown	Female	Unknown	IIIA	T2	M0	N2
TCGA-75-6212		0	Unknown	Female	Unknown	IIB	T2	M0	N1
TCGA-75-6211		1	Unknown	Female	Unknown	IB	T2	M0	N0
TCGA-75-5122		1	Unknown	Male	Unknown	IB	T2	M0	N0
For follow-up status; 0, alive; 1, dead. TCGA, The Cancer Genome Atlas; T, tumor; N, lymph node; M, metastasis.

## Sheet: Table SII
Table SII. Kyoto Encyclopedia of Genes and Genomes enrichment analysis.
Name	Size	ES	NES	NOM P-value	FDR q-value	FWER P-value	RANK AT MAX	LEADING EDGE
KEGG_UBIQUITIN_MEDIATED_PROTEOLYSIS	135	0.53815	2.1223	0	0.0168106	0.009	3970	tags=33%, list=7%, signal=35%
KEGG_TGF_BETA_SIGNALING_PATHWAY	86	0.492165	1.9106	0.00395257	0.100553	0.088	2439	tags=21%, list=4%, signal=22%
KEGG_MTOR_SIGNALING_PATHWAY	52	0.502859	1.90702	0.0037594	0.0709725	0.092	4680	tags=35%, list=8%, signal=38%
KEGG_ENDOMETRIAL_CANCER	52	0.529183	1.89737	0.00784314	0.0584552	0.099	2338	tags=29%, list=4%, signal=30%
KEGG_PROSTATE_CANCER	89	0.488503	1.88343	0.00561798	0.0534794	0.109	10260	tags=40%, list=19%, signal=50%
KEGG_COLORECTAL_CANCER	62	0.495017	1.86685	0.0077821	0.0513037	0.124	2700	tags=27%, list=5%, signal=29%
KEGG_ADHERENS_JUNCTION	73	0.520678	1.85099	0.0114723	0.0506242	0.143	9065	tags=44%, list=16%, signal=52%
KEGG_PHOSPHATIDYLINOSITOL_SIGNALING_SYSTEM	76	0.505925	1.84801	0.0135397	0.0450518	0.146	7574	tags=36%, list=14%, signal=41%
KEGG_ERBB_SIGNALING_PATHWAY	87	0.476333	1.84401	0.00582524	0.0411381	0.148	6459	tags=32%, list=12%, signal=36%
KEGG_RIG_I_LIKE_RECEPTOR_SIGNALING_PATHWAY	70	0.480187	1.83838	0.00191205	0.0392155	0.155	5098	tags=29%, list=9%, signal=31%
KEGG_TASTE_TRANSDUCTION	51	0.530068	1.81864	0.00202429	0.0419807	0.176	13046	tags=45%, list=24%, signal=59%
KEGG_WNT_SIGNALING_PATHWAY	151	0.430439	1.81791	0.00579151	0.0387908	0.176	4418	tags=21%, list=8%, signal=23%
KEGG_INOSITOL_PHOSPHATE_METABOLISM	54	0.520014	1.81022	0.0078125	0.0388163	0.192	3474	tags=30%, list=6%, signal=32%
KEGG_RNA_DEGRADATION	59	0.536869	1.78216	0.00823045	0.0432358	0.211	2413	tags=31%, list=4%, signal=32%
KEGG_SMALL_CELL_LUNG_CANCER	84	0.4605	1.74615	0.0184843	0.0526369	0.249	15741	tags=44%, list=28%, signal=61%
KEGG_NON_SMALL_CELL_LUNG_CANCER	54	0.480848	1.73185	0.0230769	0.0541861	0.264	9892	tags=41%, list=18%, signal=50%
KEGG_ACUTE_MYELOID_LEUKEMIA	57	0.482071	1.72043	0.0304183	0.055685	0.28	3591	tags=30%, list=6%, signal=32%
KEGG_CHRONIC_MYELOID_LEUKEMIA	73	0.466627	1.70703	0.0214425	0.0590993	0.312	6459	tags=34%, list=12%, signal=39%
KEGG_RENAL_CELL_CARCINOMA	70	0.446199	1.69393	0.0169811	0.0613223	0.328	3935	tags=26%, list=7%, signal=28%
KEGG_NEUROTROPHIN_SIGNALING_PATHWAY	126	0.42027	1.66383	0.0303605	0.0709249	0.369	3502	tags=23%, list=6%, signal=25%
KEGG_PANCREATIC_CANCER	70	0.450183	1.66309	0.0249042	0.0677671	0.37	3820	tags=29%, list=7%, signal=31%
KEGG_CELL_CYCLE	125	0.509922	1.65611	0.0639098	0.0674991	0.377	7135	tags=36%, list=13%, signal=41%
KEGG_NOD_LIKE_RECEPTOR_SIGNALING_PATHWAY	62	0.483709	1.65423	0.0490566	0.0651778	0.378	7709	tags=31%, list=14%, signal=36%
KEGG_GLIOMA	65	0.438798	1.64165	0.031068	0.0675549	0.397	9892	tags=35%, list=18%, signal=43%
KEGG_INSULIN_SIGNALING_PATHWAY	137	0.383896	1.60443	0.0172084	0.0809861	0.456	10741	tags=33%, list=19%, signal=41%
KEGG_SPLICEOSOME	127	0.520358	1.59562	0.0858779	0.0817397	0.468	3779	tags=29%, list=7%, signal=31%
KEGG_LONG_TERM_POTENTIATION	70	0.394928	1.57894	0.025	0.086715	0.495	16685	tags=43%, list=30%, signal=61%
KEGG_T_CELL_RECEPTOR_SIGNALING_PATHWAY	108	0.446345	1.57859	0.0543689	0.0836968	0.495	3617	tags=23%, list=7%, signal=25%
KEGG_FC_EPSILON_RI_SIGNALING_PATHWAY	79	0.410138	1.56848	0.0451866	0.0868447	0.515	4646	tags=23%, list=8%, signal=25%
KEGG_OOCYTE_MEIOSIS	113	0.415422	1.5674	0.0434783	0.0847626	0.522	5890	tags=26%, list=11%, signal=29%
KEGG_MAPK_SIGNALING_PATHWAY	267	0.351443	1.55852	0.0304762	0.0859123	0.539	6459	tags=18%, list=12%, signal=20%
KEGG_B_CELL_RECEPTOR_SIGNALING_PATHWAY	75	0.453963	1.55812	0.0642023	0.0834073	0.541	3480	tags=24%, list=6%, signal=26%
KEGG_PATHWAYS_IN_CANCER	325	0.362402	1.55115	0.0311284	0.084612	0.548	9892	tags=26%, list=18%, signal=32%
KEGG_PROGESTERONE_MEDIATED_OOCYTE_MATURATION	85	0.412725	1.53214	0.0478012	0.0903421	0.57	5316	tags=26%, list=10%, signal=29%
KEGG_ADIPOCYTOKINE_SIGNALING_PATHWAY	67	0.407758	1.49147	0.0435606	0.108248	0.632	4192	tags=19%, list=8%, signal=21%
KEGG_JAK_STAT_SIGNALING_PATHWAY	155	0.369755	1.47561	0.0558767	0.114189	0.654	6017	tags=18%, list=11%, signal=20%
KEGG_TIGHT_JUNCTION	132	0.36887	1.46312	0.0412758	0.117739	0.666	5387	tags=23%, list=10%, signal=26%
KEGG_TOLL_LIKE_RECEPTOR_SIGNALING_PATHWAY	102	0.38791	1.44229	0.104651	0.128443	0.708	5098	tags=23%, list=9%, signal=25%
KEGG_GNRH_SIGNALING_PATHWAY	101	0.3541	1.41455	0.0708812	0.144174	0.75	6038	tags=21%, list=11%, signal=23%
KEGG_LONG_TERM_DEPRESSION	70	0.3522	1.41334	0.0492126	0.141281	0.752	16386	tags=36%, list=30%, signal=51%
KEGG_HEDGEHOG_SIGNALING_PATHWAY	56	0.396299	1.40969	0.0731225	0.140144	0.754	4359	tags=14%, list=8%, signal=15%
KEGG_MELANOMA	71	0.361087	1.39051	0.0845865	0.149172	0.78	17560	tags=42%, list=32%, signal=62%
KEGG_VEGF_SIGNALING_PATHWAY	76	0.343678	1.37556	0.0729367	0.155756	0.795	4418	tags=20%, list=8%, signal=21%
KEGG_GAP_JUNCTION	90	0.351174	1.35506	0.0881226	0.166044	0.814	17812	tags=40%, list=32%, signal=59%
KEGG_APOPTOSIS	87	0.338149	1.3117	0.132597	0.19546	0.851	5098	tags=20%, list=9%, signal=21%
KEGG_P53_SIGNALING_PATHWAY	68	0.333745	1.278	0.164436	0.221348	0.89	18069	tags=43%, list=33%, signal=63%
KEGG_EPITHELIAL_CELL_SIGNALING_IN_HELICOBACTER_PYLORI_INFECTION	68	0.34502	1.26469	0.174081	0.230095	0.907	3474	tags=19%, list=6%, signal=20%
KEGG_REGULATION_OF_ACTIN_CYTOSKELETON	213	0.315891	1.24912	0.16699	0.239847	0.921	3499	tags=15%, list=6%, signal=16%
KEGG_FOCAL_ADHESION	199	0.342031	1.24516	0.210728	0.238361	0.922	3541	tags=17%, list=6%, signal=18%
KEGG_LEUKOCYTE_TRANSENDOTHELIAL_MIGRATION	116	0.349294	1.24321	0.217391	0.235676	0.922	3474	tags=17%, list=6%, signal=18%
KEGG_ENDOCYTOSIS	181	0.309317	1.241	0.182524	0.232642	0.922	6814	tags=20%, list=12%, signal=23%
KEGG_CYTOSOLIC_DNA_SENSING_PATHWAY	54	0.351285	1.22388	0.211132	0.24289	0.929	5067	tags=17%, list=9%, signal=18%
KEGG_FC_GAMMA_R_MEDIATED_PHAGOCYTOSIS	96	0.331952	1.21469	0.234951	0.247063	0.935	11251	tags=30%, list=20%, signal=38%
KEGG_MELANOGENESIS	101	0.306024	1.21158	0.179487	0.245316	0.936	19693	tags=41%, list=36%, signal=63%
KEGG_VASCULAR_SMOOTH_MUSCLE_CONTRACTION	114	0.299774	1.20014	0.224206	0.252461	0.943	12289	tags=27%, list=22%, signal=35%
KEGG_ARRHYTHMOGENIC_RIGHT_VENTRICULAR_CARDIOMYOPATHY_ARVC	74	0.32774	1.17223	0.238095	0.274687	0.961	19698	tags=43%, list=36%, signal=67%
KEGG_CHEMOKINE_SIGNALING_PATHWAY	188	0.313474	1.15108	0.304348	0.291758	0.971	10093	tags=22%, list=18%, signal=27%
KEGG_CALCIUM_SIGNALING_PATHWAY	177	0.259189	1.1081	0.298	0.332584	0.984	18898	tags=33%, list=34%, signal=50%
KEGG_AXON_GUIDANCE	129	0.269853	1.0686	0.356877	0.37632	0.994	4465	tags=14%, list=8%, signal=15%
KEGG_OLFACTORY_TRANSDUCTION	386	0.303178	1.03939	0.448852	0.407346	0.996	31206	tags=64%, list=56%, signal=146%
KEGG_NATURAL_KILLER_CELL_MEDIATED_CYTOTOXICITY	132	0.275325	1.01095	0.417457	0.436912	0.998	3480	tags=12%, list=6%, signal=13%
KEGG_LEISHMANIA_INFECTION	70	0.327003	0.968106	0.45614	0.489631	0.999	3820	tags=16%, list=7%, signal=17%
KEGG_BASAL_CELL_CARCINOMA	55	0.277933	0.95893	0.505837	0.495509	0.999	22097	tags=35%, list=40%, signal=58%
KEGG_VIRAL_MYOCARDITIS	68	0.247364	0.748855	0.686117	0.815106	0.999	5098	tags=13%, list=9%, signal=15%
KEGG_DILATED_CARDIOMYOPATHY	90	0.182467	0.662566	0.911877	0.914539	0.999	20259	tags=32%, list=37%, signal=51%
KEGG_ECM_RECEPTOR_INTERACTION	84	0.2129	0.653313	0.829412	0.910297	1	23770	tags=42%, list=43%, signal=73%
KEGG_ANTIGEN_PROCESSING_AND_PRESENTATION	81	0.212898	0.649823	0.826176	0.90023	1	2677	tags=7%, list=5%, signal=8%
KEGG_NEUROACTIVE_LIGAND_RECEPTOR_INTERACTION	271	0.106861	0.454601	1	0.989516	1	29971	tags=43%, list=54%, signal=94%

## Sheet: Table SIII
Table SIII.The correlation analysis between DDX46 expression and several immune checkpoints in lung adenocarcinoma.
Var1	Var2	Correlation	P-value	Low	High
CTLA4	CD274	0.332368	1.23e-13	0.51109	0.642839
CTLA4	PDCD1	0.515077	2.44e-33	0.67457	0.776857
CTLA4	PDCD1LG2	0.447672	1.22e-24	0.563195	0.693168
DDX46	CD274	0.106422	0.0207492	0.0945441	0.275412
DDX46	PDCD1	0.03189	0.489461	-8.17e-05	0.18478
DDX46	PDCD1LG2	0.173645	0.000149811	0.0973964	0.280554
DDX46	CTLA4	0.118053	0.0102597	0.0324412	0.220846
DDX46	HAVCR2	0.0879909	0.0560959	0.0167267	0.212547
DDX46	LAG3	0.072278	0.116842	-0.00927021	0.180512
DDX46	TIGIT	0.135975	0.00307588	0.0874792	0.260153
HAVCR2	CD274	0.394852	4.63e-19	0.604486	0.721298
HAVCR2	PDCD1	0.470474	2.27e-27	0.462831	0.609008
HAVCR2	PDCD1LG2	0.744163	2.18e-84	0.779606	0.854714
HAVCR2	CTLA4	0.449402	7.67e-25	0.543354	0.66985
LAG3	CD274	0.278185	7.77e-10	0.417894	0.568651
LAG3	PDCD1	0.590118	1.27e-45	0.694811	0.797944
LAG3	PDCD1LG2	0.424074	5.02e-22	0.463138	0.607716
LAG3	CTLA4	0.406368	3.4e-20	0.566417	0.688446
LAG3	HAVCR2	0.315819	2.16e-12	0.366752	0.515769
PDCD1	CD274	0.380394	1.07e-17	0.471733	0.618394
PDCD1LG2	CD274	0.530955	1.1e-35	0.676494	0.773271
PDCD1LG2	PDCD1	0.5163	1.62e-33	0.529704	0.670962
TIGIT	CD274	0.332127	1.28e-13	0.510583	0.645477
TIGIT	PDCD1	0.742906	5.82e-84	0.777201	0.863754
TIGIT	PDCD1LG2	0.559571	3.04e-40	0.622054	0.731881
TIGIT	CTLA4	0.683851	2.43e-66	0.839571	0.895439
TIGIT	HAVCR2	0.514844	2.63e-33	0.523879	0.65073
TIGIT	LAG3	0.557222	7.48e-40	0.651139	0.763786

## Sheet: Table SIV
Table SIV.The correlation analysis between DDX46 expression and several chemokines in lung adenocarcinoma.
Var1	Var2	Correlation	P-value	Low	High
CCL2	CCL1	0.0934113	0.0338889	0.20593	0.3629
CCL3	CCL1	0.219367	4.84e-07	0.30891	0.461433
CCL4	CCL1	0.127679	0.00367042	0.30139	0.458068
CCL5	CCL1	0.0734359	0.0956439	0.230951	0.386276
CCL7	CCL1	0.12906	0.00331564	0.270867	0.419609
CCL8	CCL1	0.0957748	0.0296068	0.270643	0.424416
CCL11	CCL1	0.050571	0.251506	0.280829	0.437539
CCL13	CCL1	0.201379	4.01e-06	0.283989	0.443394
CCL14	CCL1	-0.01162	0.7923	-0.0714209	0.10213
CCL15	CCL1	-0.00503862	0.909096	-0.0622015	0.116231
CCL16	CCL1	-0.0456138	0.301055	-0.102641	0.0691928
CCL17	CCL1	0.34186	1.36e-15	0.211903	0.373833
CCL18	CCL1	0.0475432	0.281049	0.239594	0.392962
CCL19	CCL1	0.0662254	0.133006	0.235409	0.397934
CCL20	CCL1	0.00213142	0.961478	-0.00211481	0.165523
CCL21	CCL1	0.0149408	0.734922	0.0952109	0.277836
CCL22	CCL1	0.0938087	0.0331341	0.229134	0.391148
CCL23	CCL1	0.0709366	0.107509	0.161998	0.332324
CCL24	CCL1	0.121478	0.00572743	0.0902685	0.263733
CCL25	CCL1	0.00952146	0.82917	0.219323	0.368029
CCL26	CCL1	0.109949	0.0124518	0.188271	0.348512
CCL28	CCL1	0.0249694	0.571457	0.0395894	0.21349
CX3CL1	CCL1	0.17132	9.19e-05	0.138172	0.301604
CXCL1	CCL1	0.0337584	0.444151	-0.0249968	0.137135
CXCL2	CCL1	0.0465369	0.291369	-0.104693	0.0660643
CXCL3	CCL1	-0.0248102	0.573913	-0.0641501	0.102163
CXCL5	CCL1	-0.0167015	0.705065	-0.0387509	0.13127
CXCL6	CCL1	-0.00303987	0.945081	-0.0329825	0.142992
CXCL8	CCL1	0.0173371	0.694395	0.0274588	0.19112
CXCL9	CCL1	0.0611991	0.165105	0.257572	0.416246
CXCL10	CCL1	0.0716979	0.103778	0.291464	0.441737
CXCL11	CCL1	0.0124021	0.778674	0.244694	0.397606
CXCL12	CCL1	-0.00928232	0.833397	0.158735	0.321662
CXCL13	CCL1	0.0159409	0.717912	0.16096	0.326336
CXCL14	CCL1	0.0874719	0.0470368	0.0330247	0.204874
CXCL16	CCL1	-0.0434759	0.324303	-0.101811	0.0649508
CXCL17	CCL1	-0.0637038	0.148449	-0.168048	0.00765809
XCL1	CCL1	-0.0124847	0.777238	0.0830291	0.258746
XCL2	CCL1	0.0943544	0.0321207	0.195225	0.35653
DDX46	CCL1	-0.0507362	0.249958	-0.0911431	0.0892263
CCL3	CCL2	0.504638	1.09e-34	0.52473	0.646373
CCL4	CCL2	0.362416	1.84e-17	0.405299	0.551192
CCL5	CCL2	0.155348	0.000397409	0.202955	0.375177
CCL7	CCL2	0.582561	3.22e-48	0.542207	0.657278
CCL8	CCL2	0.522092	2.02e-37	0.622357	0.728686
CCL11	CCL2	0.321922	6.61e-14	0.341666	0.487774
CCL13	CCL2	0.470751	8.1e-30	0.408914	0.551485
CCL14	CCL2	0.0159992	0.716923	-0.0218917	0.15538
CCL15	CCL2	-0.0539194	0.221431	-0.107346	0.0637134
CCL16	CCL2	-0.00175364	0.968302	-0.0287724	0.132774
CCL17	CCL2	0.0572344	0.194278	0.145098	0.31234
CCL18	CCL2	0.275183	2.03e-10	0.256424	0.415006
CCL19	CCL2	0.0889578	0.0434001	0.179808	0.351103
CCL20	CCL2	0.045079	0.306765	0.0529721	0.226996
CCL21	CCL2	0.0458956	0.298076	0.165204	0.330328
CCL22	CCL2	0.0720476	0.102099	0.192926	0.358124
CCL23	CCL2	0.295916	6.89e-12	0.300257	0.455619
CCL24	CCL2	0.125448	0.00431717	0.0943939	0.272597
CCL25	CCL2	-0.00622288	0.887858	0.0850966	0.249709
CCL26	CCL2	0.142012	0.0012187	0.199922	0.370532
CCL28	CCL2	0.086206	0.0503333	0.152351	0.309807
CX3CL1	CCL2	0.177562	4.99e-05	0.237528	0.388606
CXCL1	CCL2	0.210102	1.47e-06	0.24597	0.412318
CXCL2	CCL2	0.228258	1.59e-07	0.136793	0.30505
CXCL3	CCL2	0.273361	2.7e-10	0.242586	0.401765
CXCL5	CCL2	0.0243221	0.581474	0.0988989	0.271491
CXCL6	CCL2	0.13469	0.00216841	0.180858	0.351709
CXCL8	CCL2	0.312689	3.63e-13	0.34279	0.488874
CXCL9	CCL2	0.114977	0.00894608	0.178377	0.349047
CXCL10	CCL2	0.32443	4.12e-14	0.338441	0.488274
CXCL11	CCL2	0.144945	0.000960022	0.287084	0.440689
CXCL12	CCL2	0.312333	3.87e-13	0.352065	0.497066
CXCL13	CCL2	0.0865424	0.049439	0.0661073	0.244265
CXCL14	CCL2	-0.0392281	0.373856	0.0461723	0.209278
CXCL16	CCL2	0.0152747	0.729228	-0.0125537	0.168436
CXCL17	CCL2	-0.0567809	0.197841	-0.143741	0.0338436
XCL1	CCL2	0.0264221	0.549277	0.0591	0.233991
XCL2	CCL2	0.204182	2.92e-06	0.166377	0.328616
DDX46	CCL2	0.062214	0.158195	0.0154846	0.193329
CCL4	CCL3	0.815468	3.76e-124	0.781279	0.846674
CCL5	CCL3	0.485145	8.04e-32	0.45799	0.58109
CCL7	CCL3	0.450935	3.28e-27	0.453573	0.591711
CCL8	CCL3	0.629566	2.55e-58	0.713877	0.790967
CCL11	CCL3	0.178909	4.37e-05	0.221736	0.383593
CCL13	CCL3	0.456116	7.09e-28	0.359588	0.507977
CCL14	CCL3	0.032345	0.463469	-0.109649	0.0723019
CCL15	CCL3	-0.00233778	0.957752	-0.00557615	0.167636
CCL16	CCL3	0.00390189	0.929543	-0.102983	0.0715646
CCL17	CCL3	0.0911557	0.0384572	0.105842	0.271925
CCL18	CCL3	0.38437	1.3e-19	0.415658	0.553592
CCL19	CCL3	0.140247	0.00140373	0.212249	0.373518
CCL20	CCL3	0.000883883	0.98402	0.0151449	0.184659
CCL21	CCL3	0.115983	0.00836049	0.199881	0.367345
CCL22	CCL3	0.0845099	0.055051	0.123824	0.284589
CCL23	CCL3	0.34589	6.01e-16	0.313343	0.458781
CCL24	CCL3	0.240672	3.11e-08	0.16959	0.335898
CCL25	CCL3	0.0728495	0.0983294	0.233007	0.38968
CCL26	CCL3	0.299427	3.78e-12	0.256238	0.409896
CCL28	CCL3	0.000778651	0.985922	0.0737215	0.244059
CX3CL1	CCL3	0.0588741	0.181786	0.0529136	0.230971
CXCL1	CCL3	0.108805	0.0134011	0.128008	0.29193
CXCL2	CCL3	0.156951	0.000345192	0.0810204	0.251754
CXCL3	CCL3	0.182087	3.17e-05	0.221091	0.385415
CXCL5	CCL3	0.0512488	0.2452	0.0623805	0.239183
CXCL6	CCL3	0.017765	0.687246	0.045185	0.227266
CXCL8	CCL3	0.19618	7.15e-06	0.204019	0.362204
CXCL9	CCL3	0.456074	7.18e-28	0.432533	0.568519
CXCL10	CCL3	0.550514	3.19e-42	0.532925	0.659287
CXCL11	CCL3	0.304178	1.66e-12	0.437955	0.579708
CXCL12	CCL3	0.14266	0.00115651	0.219894	0.376322
CXCL13	CCL3	0.1676	0.00013077	0.20644	0.369398
CXCL14	CCL3	-0.046567	0.291057	-0.0353931	0.132136
CXCL16	CCL3	0.0575769	0.191618	-0.0016675	0.172158
CXCL17	CCL3	-0.109908	0.0124841	-0.260505	-0.0845435
XCL1	CCL3	0.176996	5.28e-05	0.269074	0.423727
XCL2	CCL3	0.541076	1.41e-40	0.406416	0.539119
DDX46	CCL3	-0.0486167	0.270317	-0.0774117	0.106492
CCL5	CCL4	0.732676	6.02e-88	0.745905	0.820133
CCL7	CCL4	0.294121	9.34e-12	0.362477	0.492761
CCL8	CCL4	0.581822	4.5e-48	0.656885	0.748322
CCL11	CCL4	0.246224	1.45e-08	0.288744	0.448984
CCL13	CCL4	0.395968	8.12e-21	0.28242	0.437343
CCL14	CCL4	-0.0181512	0.680816	-0.0769458	0.105117
CCL15	CCL4	-0.0231425	0.599937	-0.0270693	0.157294
CCL16	CCL4	0.00284187	0.948653	-0.0538268	0.112419
CCL17	CCL4	0.00245546	0.955627	0.0451264	0.21293
CCL18	CCL4	0.323054	5.34e-14	0.393531	0.542524
CCL19	CCL4	0.20366	3.1e-06	0.354015	0.495415
CCL20	CCL4	0.0233578	0.596547	0.0333502	0.203786
CCL21	CCL4	0.210053	1.48e-06	0.31152	0.46639
CCL22	CCL4	0.107096	0.0149388	0.105775	0.275948
CCL23	CCL4	0.233023	8.59e-08	0.223304	0.385829
CCL24	CCL4	0.204733	2.74e-06	0.174397	0.349708
CCL25	CCL4	0.10643	0.0155785	0.354693	0.495341
CCL26	CCL4	0.316867	1.69e-13	0.270797	0.431282
CCL28	CCL4	-0.0572054	0.194505	0.00446649	0.170493
CX3CL1	CCL4	0.0469409	0.287196	0.0235164	0.200542
CXCL1	CCL4	0.13889	0.00156331	0.0988502	0.276596
CXCL2	CCL4	0.172768	7.99e-05	0.0750901	0.245194
CXCL3	CCL4	0.187353	1.84e-05	0.16935	0.331497
CXCL5	CCL4	0.0563358	0.201385	0.00355324	0.188603
CXCL6	CCL4	0.0334692	0.448066	0.0713571	0.243253
CXCL8	CCL4	0.143765	0.0010573	0.139737	0.305263
CXCL9	CCL4	0.690043	3.47e-74	0.71986	0.802209
CXCL10	CCL4	0.681653	9.37e-72	0.754338	0.822073
CXCL11	CCL4	0.480035	4.24e-31	0.677251	0.764701
CXCL12	CCL4	0.175965	5.85e-05	0.260361	0.425725
CXCL13	CCL4	0.270181	4.41e-10	0.445782	0.571791
CXCL14	CCL4	-0.067044	0.128269	-0.0323428	0.137609
CXCL16	CCL4	-0.00654421	0.882108	-0.0930457	0.0848556
CXCL17	CCL4	-0.149458	0.000659323	-0.310483	-0.141257
XCL1	CCL4	0.23217	9.6e-08	0.399512	0.547449
XCL2	CCL4	0.672259	3.96e-69	0.576511	0.691439
DDX46	CCL4	-0.00262493	0.952568	-0.0590983	0.12925
CCL7	CCL5	0.129836	0.00313008	0.135979	0.291321
CCL8	CCL5	0.382682	1.93e-19	0.433236	0.560983
CCL11	CCL5	0.221903	3.54e-07	0.247492	0.403904
CCL13	CCL5	0.188355	1.66e-05	0.136088	0.296326
CCL14	CCL5	0.025793	0.558829	0.0738324	0.250749
CCL15	CCL5	0.0235842	0.592991	0.0721363	0.241147
CCL16	CCL5	0.0299479	0.497273	0.0182589	0.190597
CCL17	CCL5	0.000227139	0.995893	0.108544	0.273569
CCL18	CCL5	0.182381	3.07e-05	0.296269	0.447581
CCL19	CCL5	0.382941	1.82e-19	0.520729	0.647155
CCL20	CCL5	-0.00774465	0.860686	-0.0447601	0.142424
CCL21	CCL5	0.232447	9.26e-08	0.331715	0.494951
CCL22	CCL5	0.0794347	0.0714065	0.142481	0.315415
CCL23	CCL5	0.0930396	0.0346082	0.134566	0.298205
CCL24	CCL5	0.0911892	0.0383855	0.0538821	0.235761
CCL25	CCL5	0.18772	1.77e-05	0.410381	0.549666
CCL26	CCL5	0.228613	1.52e-07	0.14343	0.311662
CCL28	CCL5	-0.0460233	0.296733	0.00236983	0.173375
CX3CL1	CCL5	0.0181999	0.680007	0.0463046	0.221369
CXCL1	CCL5	0.0477244	0.279218	-0.0181485	0.15501
CXCL2	CCL5	-0.0059038	0.893573	-0.0408727	0.13145
CXCL3	CCL5	0.0141445	0.74856	-0.0305817	0.143252
CXCL5	CCL5	-0.0113429	0.797144	-0.133107	0.0417065
CXCL6	CCL5	-0.0267477	0.544365	0.0133757	0.184268
CXCL8	CCL5	-0.0213015	0.629267	-0.1258	0.0482547
CXCL9	CCL5	0.663717	8.01e-67	0.797828	0.855896
CXCL10	CCL5	0.594081	1.53e-50	0.715281	0.790865
CXCL11	CCL5	0.47017	9.72e-30	0.720158	0.795489
CXCL12	CCL5	0.16261	0.000207635	0.226053	0.387844
CXCL13	CCL5	0.372866	1.83e-18	0.590306	0.700843
CXCL14	CCL5	-0.0310382	0.481737	0.0208877	0.201547
CXCL16	CCL5	-0.0170399	0.699378	-0.0550476	0.12782
CXCL17	CCL5	-0.0804839	0.0677339	-0.184959	0.00112625
XCL1	CCL5	0.250243	8.28e-09	0.459502	0.607047
XCL2	CCL5	0.629707	2.37e-58	0.693609	0.78133
DDX46	CCL5	-0.0867906	0.0487877	-0.12677	0.0503351
CCL8	CCL7	0.692576	6.17e-75	0.667476	0.758482
CCL11	CCL7	0.223112	3.05e-07	0.355673	0.495358
CCL13	CCL7	0.43173	7.66e-25	0.320114	0.46762
CCL14	CCL7	-0.133857	0.0023114	-0.326291	-0.155796
CCL15	CCL7	-0.0590051	0.180814	-0.16533	0.00912006
CCL16	CCL7	-0.131472	0.00276957	-0.27808	-0.108712
CCL17	CCL7	-0.0189802	0.667093	-0.0472782	0.120386
CCL18	CCL7	0.21178	1.21e-06	0.277222	0.43672
CCL19	CCL7	-0.0719691	0.102474	-0.0532867	0.111914
CCL20	CCL7	0.0194576	0.659241	0.103198	0.269594
CCL21	CCL7	0.0581966	0.186873	0.1171	0.28448
CCL22	CCL7	0.0855919	0.052001	0.0256417	0.193749
CCL23	CCL7	0.200819	4.27e-06	0.151496	0.310413
CCL24	CCL7	0.136823	0.00183851	0.104791	0.28811
CCL25	CCL7	-0.00516776	0.906777	0.0816947	0.248794
CCL26	CCL7	0.209115	1.65e-06	0.388486	0.541195
CCL28	CCL7	0.0434486	0.324607	0.0217899	0.196215
CX3CL1	CCL7	0.00301186	0.945586	-0.0536469	0.119042
CXCL1	CCL7	0.0259414	0.556569	0.0657628	0.240716
CXCL2	CCL7	-0.0157377	0.721357	-0.0950352	0.0768907
CXCL3	CCL7	0.0416433	0.345134	0.0655696	0.246774
CXCL5	CCL7	0.0615307	0.162822	0.177958	0.34409
CXCL6	CCL7	0.0622384	0.158031	0.130006	0.30252
CXCL8	CCL7	0.265488	8.99e-10	0.3768	0.517963
CXCL9	CCL7	0.089471	0.0422006	0.170038	0.327491
CXCL10	CCL7	0.386354	8.15e-20	0.389187	0.51636
CXCL11	CCL7	0.197362	6.28e-06	0.271359	0.425681
CXCL12	CCL7	0.0982605	0.0256122	0.118722	0.29364
CXCL13	CCL7	-0.0114037	0.796081	-0.0124842	0.158463
CXCL14	CCL7	-0.0464791	0.291969	-0.0255496	0.14302
CXCL16	CCL7	-0.0615259	0.162855	-0.157241	0.0215036
CXCL17	CCL7	-0.0809991	0.065988	-0.272475	-0.100335
XCL1	CCL7	0.0563178	0.20153	0.0371991	0.212657
XCL2	CCL7	0.167288	0.000134656	0.0676668	0.238263
DDX46	CCL7	0.0358355	0.416612	-0.063829	0.110637
CCL11	CCL8	0.32426	4.26e-14	0.34505	0.494194
CCL13	CCL8	0.421124	1.35e-23	0.366782	0.513549
CCL14	CCL8	-0.10421	0.0178887	-0.187586	-0.0173295
CCL15	CCL8	-0.0617693	0.161195	-0.0588315	0.112968
CCL16	CCL8	-0.094887	0.0311575	-0.170877	0.000968351
CCL17	CCL8	-0.0274264	0.534195	-0.0514304	0.128019
CCL18	CCL8	0.229846	1.3e-07	0.32916	0.478282
CCL19	CCL8	0.0190856	0.665357	0.108882	0.26915
CCL20	CCL8	0.000343213	0.993795	0.00536644	0.173663
CCL21	CCL8	0.121795	0.00560099	0.198042	0.363966
CCL22	CCL8	0.0715593	0.104449	0.025806	0.200453
CCL23	CCL8	0.170717	9.73e-05	0.157649	0.334817
CCL24	CCL8	0.146553	0.000840727	0.100584	0.275804
CCL25	CCL8	0.0546524	0.215205	0.222486	0.386696
CCL26	CCL8	0.267659	6.48e-10	0.351279	0.494758
CCL28	CCL8	0.0111081	0.801255	0.0394257	0.205499
CX3CL1	CCL8	0.0248772	0.572877	-0.0399927	0.138549
CXCL1	CCL8	0.0145773	0.741138	0.0625949	0.230596
CXCL2	CCL8	-0.0173356	0.69442	-0.0722744	0.104413
CXCL3	CCL8	0.0372672	0.398228	0.095566	0.266053
CXCL5	CCL8	0.0902823	0.0403611	0.0791894	0.252487
CXCL6	CCL8	0.0240859	0.585149	0.0539406	0.224262
CXCL8	CCL8	0.162143	0.000216666	0.231453	0.389384
CXCL9	CCL8	0.380453	3.23e-19	0.465638	0.592419
CXCL10	CCL8	0.696453	4.23e-76	0.657643	0.757581
CXCL11	CCL8	0.440839	6.02e-26	0.566657	0.67979
CXCL12	CCL8	0.196127	7.19e-06	0.280958	0.441249
CXCL13	CCL8	0.110994	0.011636	0.17229	0.329819
CXCL14	CCL8	-0.0941596	0.0324794	-0.0912951	0.0805032
CXCL16	CCL8	-0.0637612	0.148083	-0.11469	0.0686816
CXCL17	CCL8	-0.143569	0.00107426	-0.2826	-0.10626
XCL1	CCL8	0.145798	0.000894975	0.220527	0.389398
XCL2	CCL8	0.369386	3.98e-18	0.359428	0.499312
DDX46	CCL8	0.0382848	0.385464	0.0122123	0.186617
CCL13	CCL11	0.0911638	0.0384398	0.0920052	0.26634
CCL14	CCL11	-0.110933	0.0116829	-0.140735	0.0290824
CCL15	CCL11	-0.0308348	0.484614	-0.10171	0.0757504
CCL16	CCL11	-0.100446	0.0224931	-0.136519	0.0339249
CCL17	CCL11	0.0456815	0.300339	-0.0169027	0.156
CCL18	CCL11	0.00107399	0.980584	0.056628	0.234214
CCL19	CCL11	0.0695599	0.114525	0.157512	0.331648
CCL20	CCL11	0.0325542	0.46058	0.000303449	0.185279
CCL21	CCL11	0.0971888	0.0272735	0.206231	0.372305
CCL22	CCL11	0.173847	7.2e-05	0.102515	0.273051
CCL23	CCL11	-0.0399128	0.365568	-0.0180498	0.158132
CCL24	CCL11	0.0817239	0.0635946	0.112927	0.279624
CCL25	CCL11	0.0328681	0.456265	0.221059	0.373301
CCL26	CCL11	0.266191	8.09e-10	0.327963	0.483808
CCL28	CCL11	-0.0102363	0.816564	0.0562295	0.223305
CX3CL1	CCL11	0.0885122	0.044465	0.0831848	0.243169
CXCL1	CCL11	0.204741	2.74e-06	0.144668	0.319991
CXCL2	CCL11	-0.0203374	0.644867	-0.177563	-0.0195472
CXCL3	CCL11	0.1061	0.0159045	-0.0469522	0.123871
CXCL5	CCL11	0.116239	0.00821741	0.0290751	0.206295
CXCL6	CCL11	0.134146	0.00226088	0.280381	0.440853
CXCL8	CCL11	0.247348	1.24e-08	0.249447	0.402365
CXCL9	CCL11	0.18208	3.17e-05	0.258837	0.410126
CXCL10	CCL11	0.303936	1.73e-12	0.342007	0.485782
CXCL11	CCL11	0.212811	1.07e-06	0.30354	0.455354
CXCL12	CCL11	0.347657	4.18e-16	0.42173	0.556344
CXCL13	CCL11	0.116189	0.00824497	0.203947	0.364701
CXCL14	CCL11	0.0229102	0.603603	0.034533	0.212899
CXCL16	CCL11	-0.109496	0.01282	-0.217801	-0.0397674
CXCL17	CCL11	-0.145905	0.000887061	-0.276692	-0.0983735
XCL1	CCL11	0.0344376	0.435034	0.116826	0.296866
XCL2	CCL11	0.106234	0.0157718	0.143325	0.309033
DDX46	CCL11	-0.0634714	0.149939	-0.17581	0.00917995
CCL14	CCL13	0.0644206	0.143927	0.0595648	0.237531
CCL15	CCL13	-0.0597694	0.17522	-0.111057	0.0582977
CCL16	CCL13	0.00610042	0.890051	-0.0571944	0.129835
CCL17	CCL13	0.257757	2.82e-09	0.568979	0.682696
CCL18	CCL13	0.331607	1.04e-14	0.500599	0.632824
CCL19	CCL13	0.0324765	0.461652	0.191546	0.354704
CCL20	CCL13	0.0148172	0.737034	-0.0490448	0.118637
CCL21	CCL13	0.0973012	0.0270951	0.100093	0.276395
CCL22	CCL13	0.0622747	0.157788	0.404137	0.549901
CCL23	CCL13	0.481651	2.51e-31	0.60728	0.711793
CCL24	CCL13	0.251143	7.29e-09	0.244841	0.393046
CCL25	CCL13	-0.00308201	0.944321	-0.0315272	0.146193
CCL26	CCL13	0.129613	0.00318227	0.0553486	0.227866
CCL28	CCL13	0.0515956	0.242016	0.0836992	0.254089
CX3CL1	CCL13	0.131443	0.00277556	0.294226	0.463699
CXCL1	CCL13	-0.00965715	0.826774	-0.0136711	0.149011
CXCL2	CCL13	0.0538849	0.221727	0.0867973	0.25394
CXCL3	CCL13	0.0923756	0.0359256	0.012032	0.191325
CXCL5	CCL13	0.0989022	0.0246599	0.0404239	0.22088
CXCL6	CCL13	0.0118904	0.787582	-0.0529258	0.121217
CXCL8	CCL13	0.143358	0.00109293	0.0347419	0.209541
CXCL9	CCL13	0.160677	0.000247473	0.117494	0.277358
CXCL10	CCL13	0.296858	5.87e-12	0.21581	0.374598
CXCL11	CCL13	0.104282	0.0178101	0.190859	0.345918
CXCL12	CCL13	0.179225	4.23e-05	0.270946	0.421426
CXCL13	CCL13	0.0452656	0.304765	0.0626125	0.235873
CXCL14	CCL13	-0.00728039	0.86896	0.149939	0.324354
CXCL16	CCL13	0.0335312	0.447226	0.0931031	0.269718
CXCL17	CCL13	-0.107029	0.0150026	-0.16478	0.0195276
XCL1	CCL13	-0.00742884	0.866313	-0.071732	0.0992536
XCL2	CCL13	0.40008	2.96e-21	0.101075	0.270687
DDX46	CCL13	-0.0182048	0.679926	0.0150188	0.193867
CCL15	CCL14	0.104779	0.0172705	0.226252	0.380461
CCL16	CCL14	0.766449	6.92e-101	0.648572	0.748271
CCL17	CCL14	0.0519421	0.238863	0.204431	0.371564
CCL18	CCL14	0.2874	2.86e-11	0.143739	0.316664
CCL19	CCL14	0.227742	1.7e-07	0.38394	0.523535
CCL20	CCL14	-0.121442	0.0057418	-0.150443	0.0326792
CCL21	CCL14	0.0698088	0.113231	0.133013	0.312199
CCL22	CCL14	0.00688855	0.875954	0.185744	0.347116
CCL23	CCL14	0.330335	1.33e-14	0.312221	0.464974
CCL24	CCL14	0.0119566	0.786427	0.0619133	0.246317
CCL25	CCL14	0.0618467	0.160669	-0.0677319	0.110951
CCL26	CCL14	-0.111112	0.0115474	-0.310189	-0.153962
CCL28	CCL14	0.00155675	0.971859	-0.00906185	0.160203
CX3CL1	CCL14	0.0328477	0.456545	0.148719	0.297036
CXCL1	CCL14	0.00488781	0.911806	-0.0286608	0.146961
CXCL2	CCL14	0.118241	0.00716995	0.162004	0.331439
CXCL3	CCL14	0.122693	0.00525699	0.0597053	0.220675
CXCL5	CCL14	-0.0693764	0.115487	-0.147313	0.0183288
CXCL6	CCL14	0.124584	0.00459419	-0.0111423	0.155658
CXCL8	CCL14	-0.143901	0.0010456	-0.292212	-0.12268
CXCL9	CCL14	-0.038566	0.381981	-0.0488114	0.133633
CXCL10	CCL14	-0.0913341	0.0380778	-0.147704	0.0262265
CXCL11	CCL14	-0.0439499	0.319051	-0.0565005	0.116499
CXCL12	CCL14	0.321017	7.83e-14	0.234352	0.401294
CXCL13	CCL14	0.160867	0.000243254	0.162779	0.338376
CXCL14	CCL14	0.00715248	0.871242	0.15877	0.326936
CXCL16	CCL14	0.166339	0.000147166	0.185101	0.336386
CXCL17	CCL14	-0.00782269	0.859297	0.0639131	0.23086
XCL1	CCL14	-0.0870725	0.0480568	-0.0991956	0.0804032
XCL2	CCL14	-0.00514719	0.907146	2.54e-06	0.170321
DDX46	CCL14	0.0104542	0.812731	-0.0634431	0.111209
CCL16	CCL15	0.0448706	0.309008	0.113325	0.270593
CCL17	CCL15	0.00670288	0.879272	-0.0390619	0.123635
CCL18	CCL15	0.00379596	0.931451	0.0488867	0.235409
CCL19	CCL15	-0.00394895	0.928696	0.0903946	0.247379
CCL20	CCL15	-0.0194203	0.659853	-0.00730364	0.163768
CCL21	CCL15	-0.0139035	0.752703	0.00314941	0.180129
CCL22	CCL15	-0.0259183	0.556921	-0.025026	0.143846
CCL23	CCL15	-0.000392838	0.992897	0.0172184	0.187388
CCL24	CCL15	0.140914	0.00133098	0.00561389	0.174098
CCL25	CCL15	0.0723317	0.100751	-0.0415321	0.132301
CCL26	CCL15	0.0427121	0.332883	-0.115749	0.0603831
CCL28	CCL15	0.0190462	0.666005	-0.103169	0.074983
CX3CL1	CCL15	-0.0976247	0.026587	-0.153961	0.0176764
CXCL1	CCL15	-0.011952	0.786507	-0.00517237	0.162093
CXCL2	CCL15	-0.0577718	0.190116	-0.0393343	0.131454
CXCL3	CCL15	0.0243784	0.580599	-0.0266723	0.139073
CXCL5	CCL15	0.0166185	0.706464	-0.0177095	0.157127
CXCL6	CCL15	0.0299658	0.497016	0.0667377	0.249632
CXCL8	CCL15	-0.0255065	0.563206	-0.125915	0.0498673
CXCL9	CCL15	0.00690517	0.875657	0.00842714	0.180881
CXCL10	CCL15	-0.023964	0.58705	-0.0621796	0.111294
CXCL11	CCL15	-0.00499917	0.909805	0.00508711	0.169639
CXCL12	CCL15	-0.100917	0.0218663	-0.075295	0.0938699
CXCL13	CCL15	-0.0241174	0.584658	0.0589476	0.226848
CXCL14	CCL15	-0.0539962	0.220773	-0.0980306	0.0717758
CXCL16	CCL15	0.120864	0.00597915	0.0129687	0.181184
CXCL17	CCL15	0.00348513	0.937052	-0.0630965	0.111976
XCL1	CCL15	-0.00663631	0.880462	-0.0446724	0.136174
XCL2	CCL15	0.019845	0.652896	0.0319198	0.195402
DDX46	CCL15	-0.0681053	0.122323	-0.157505	0.0149341
CCL17	CCL16	-0.0129664	0.768882	0.0472605	0.213371
CCL18	CCL16	0.23828	4.29e-08	0.0658832	0.251988
CCL19	CCL16	0.15202	0.000530213	0.229487	0.385044
CCL20	CCL16	-0.0682909	0.121305	-0.113234	0.0578188
CCL21	CCL16	0.0504414	0.252724	0.0835105	0.253316
CCL22	CCL16	-0.00447509	0.919226	0.0473778	0.228112
CCL23	CCL16	0.305302	1.36e-12	0.20496	0.370578
CCL24	CCL16	-0.00779228	0.859838	0.0127906	0.182635
CCL25	CCL16	-0.0102331	0.816621	-0.0732964	0.0993092
CCL26	CCL16	-0.0893533	0.0424731	-0.282791	-0.111936
CCL28	CCL16	0.0474534	0.281961	7.12e-05	0.16572
CX3CL1	CCL16	-0.0035346	0.936161	0.0603875	0.23445
CXCL1	CCL16	0.0334106	0.448862	0.0465083	0.206369
CXCL2	CCL16	0.159819	0.000267341	0.158847	0.321216
CXCL3	CCL16	0.126414	0.00402559	0.0822967	0.25325
CXCL5	CCL16	-0.050434	0.252793	-0.132764	0.0337863
CXCL6	CCL16	0.104794	0.0172543	0.0192455	0.188717
CXCL8	CCL16	-0.122086	0.00548736	-0.197611	-0.0299916
CXCL9	CCL16	-0.0399707	0.364872	-0.0689629	0.0936466
CXCL10	CCL16	-0.0867071	0.049006	-0.149437	0.0217865
CXCL11	CCL16	-0.0315364	0.474726	-0.0963524	0.0897426
CXCL12	CCL16	0.230512	1.19e-07	0.209924	0.37169
CXCL13	CCL16	0.134655	0.00217425	0.0978176	0.269987
CXCL14	CCL16	-0.0383097	0.385155	0.0222684	0.200166
CXCL16	CCL16	0.15557	0.000389765	0.0978823	0.276541
CXCL17	CCL16	-0.0126933	0.773615	-0.0149037	0.161432
XCL1	CCL16	-0.0468964	0.287654	-0.0678125	0.108205
XCL2	CCL16	-0.00899649	0.838456	-0.0277545	0.146708
DDX46	CCL16	0.0185645	0.673962	-0.022479	0.149598
CCL18	CCL17	0.0463852	0.292947	0.272287	0.426114
CCL19	CCL17	0.194032	9.03e-06	0.426712	0.560271
CCL20	CCL17	-0.0222698	0.613763	-0.0150765	0.164421
CCL21	CCL17	0.0344421	0.434973	0.00749216	0.176251
CCL22	CCL17	0.264334	1.07e-09	0.574276	0.705514
CCL23	CCL17	0.219074	5.02e-07	0.482069	0.608945
CCL24	CCL17	0.121058	0.00589865	0.103787	0.27308
CCL25	CCL17	0.0187971	0.670116	-0.0662504	0.116171
CCL26	CCL17	0.0828587	0.0599913	-0.112228	0.0603274
CCL28	CCL17	0.222927	3.12e-07	0.164333	0.325234
CX3CL1	CCL17	0.232995	8.62e-08	0.441661	0.574471
CXCL1	CCL17	-0.0376524	0.393368	-0.0323598	0.147588
CXCL2	CCL17	0.0143802	0.744516	0.120608	0.286601
CXCL3	CCL17	-0.0673508	0.126527	-0.0570353	0.120624
CXCL5	CCL17	-0.0577063	0.19062	-0.11115	0.0642621
CXCL6	CCL17	-0.0443831	0.3143	-0.0314219	0.134864
CXCL8	CCL17	-0.00422196	0.923781	-0.151608	0.0158695
CXCL9	CCL17	-0.0454905	0.302365	0.00405663	0.171015
CXCL10	CCL17	-0.00869953	0.843718	0.0129965	0.180578
CXCL11	CCL17	-0.0297869	0.499588	0.0520763	0.223295
CXCL12	CCL17	0.01758	0.690334	0.0723361	0.250357
CXCL13	CCL17	0.0694785	0.114951	0.144621	0.307443
CXCL14	CCL17	0.204618	2.78e-06	0.257311	0.410488
CXCL16	CCL17	0.0384893	0.38293	0.108448	0.28588
CXCL17	CCL17	0.0332184	0.451478	0.0496757	0.223313
XCL1	CCL17	-0.0934268	0.0338593	-0.0994121	0.0797519
XCL2	CCL17	0.00525795	0.905157	0.000494769	0.174596
DDX46	CCL17	-0.0885449	0.0443862	-0.192904	-0.00550705
CCL19	CCL18	0.0437486	0.321275	0.27889	0.443506
CCL20	CCL18	0.0243204	0.5815	-0.0348952	0.140379
CCL21	CCL18	0.10609	0.0159152	0.287266	0.443606
CCL22	CCL18	0.0274341	0.534081	0.254726	0.409063
CCL23	CCL18	0.526989	3.24e-38	0.693905	0.780891
CCL24	CCL18	0.19847	5.55e-06	0.345013	0.490907
CCL25	CCL18	-0.0181408	0.680989	0.0485868	0.224378
CCL26	CCL18	0.0752626	0.0876523	0.0738114	0.237997
CCL28	CCL18	-0.0613586	0.164004	-0.103641	0.0646378
CX3CL1	CCL18	-0.0180888	0.681853	0.0657861	0.240993
CXCL1	CCL18	0.0252776	0.566716	-0.000939834	0.171452
CXCL2	CCL18	0.185519	2.23e-05	0.0904223	0.259031
CXCL3	CCL18	0.22401	2.72e-07	0.0967749	0.267284
CXCL5	CCL18	0.0175865	0.690224	0.1077	0.286636
CXCL6	CCL18	0.00545417	0.901636	-0.0219045	0.154551
CXCL8	CCL18	0.0304001	0.490797	0.0297464	0.209607
CXCL9	CCL18	0.180428	3.75e-05	0.270488	0.416683
CXCL10	CCL18	0.157569	0.000326795	0.241351	0.397285
CXCL11	CCL18	0.0893827	0.0424048	0.216459	0.372163
CXCL12	CCL18	0.107887	0.0142085	0.212018	0.371266
CXCL13	CCL18	0.0366121	0.406579	0.221769	0.382209
CXCL14	CCL18	-0.0340152	0.440691	0.0500713	0.22454
CXCL16	CCL18	0.126264	0.00406971	0.11575	0.274915
CXCL17	CCL18	-0.0610858	0.16589	-0.228583	-0.0577728
XCL1	CCL18	-0.0138935	0.752876	0.0246623	0.206687
XCL2	CCL18	0.202068	3.71e-06	0.177663	0.350507
DDX46	CCL18	-0.00467964	0.915548	0.008051	0.179666
CCL20	CCL19	-0.0394966	0.370592	-0.0555891	0.125528
CCL21	CCL19	0.12303	0.00513286	0.324382	0.476488
CCL22	CCL19	0.120759	0.00602322	0.411346	0.560818
CCL23	CCL19	0.086586	0.0493242	0.27791	0.429969
CCL24	CCL19	0.0343584	0.436091	0.0322474	0.202566
CCL25	CCL19	0.148563	0.000710935	0.29207	0.443633
CCL26	CCL19	-0.0319328	0.46919	-0.0913563	0.0809818
CCL28	CCL19	-0.0283696	0.520224	0.0253242	0.202216
CX3CL1	CCL19	0.093469	0.0337783	0.253464	0.412447
CXCL1	CCL19	-0.00341384	0.938337	-0.0116762	0.164732
CXCL2	CCL19	0.0031146	0.943733	-0.0105746	0.150059
CXCL3	CCL19	-0.0654945	0.137349	-0.0859439	0.0886249
CXCL5	CCL19	-0.0765344	0.082412	-0.209451	-0.0378052
CXCL6	CCL19	0.000359214	0.993505	0.0830852	0.252111
CXCL8	CCL19	-0.0938239	0.0331054	-0.188924	-0.0240388
CXCL9	CCL19	0.278003	1.3e-10	0.448537	0.583403
CXCL10	CCL19	0.176406	5.6e-05	0.311618	0.46178
CXCL11	CCL19	0.130845	0.00290299	0.36051	0.516666
CXCL12	CCL19	0.286799	3.16e-11	0.349245	0.511345
CXCL13	CCL19	0.698497	1.01e-76	0.608772	0.720776
CXCL14	CCL19	0.0949131	0.031111	0.246992	0.414389
CXCL16	CCL19	0.0213627	0.628283	0.0542924	0.225738
CXCL17	CCL19	0.0333876	0.449175	-0.0079954	0.162916
XCL1	CCL19	0.0917858	0.0371312	0.184585	0.355698
XCL2	CCL19	0.197885	5.93e-06	0.336483	0.478141
DDX46	CCL19	-0.0911409	0.0384888	-0.156058	0.0149863
CCL21	CCL20	-0.0151328	0.731646	-0.0372225	0.134993
CCL22	CCL20	0.018386	0.676918	0.0440092	0.213472
CCL23	CCL20	-0.0651262	0.139578	-0.137192	0.0366166
CCL24	CCL20	0.0430274	0.329325	0.0315411	0.202613
CCL25	CCL20	-0.000498062	0.990995	0.0368081	0.20926
CCL26	CCL20	0.00194843	0.964783	0.11534	0.279914
CCL28	CCL20	-0.0498709	0.258137	-0.148029	0.0315569
CX3CL1	CCL20	-0.0477263	0.279199	-0.0809003	0.0970352
CXCL1	CCL20	0.261066	1.74e-09	0.319578	0.472268
CXCL2	CCL20	0.273432	2.67e-10	0.272937	0.427693
CXCL3	CCL20	0.222193	3.42e-07	0.216872	0.372219
CXCL5	CCL20	0.0628319	0.154095	0.24385	0.402297
CXCL6	CCL20	0.0609816	0.166614	0.139534	0.312448
CXCL8	CCL20	0.305954	1.21e-12	0.343222	0.492346
CXCL9	CCL20	-0.0473004	0.283516	-0.0746942	0.0968161
CXCL10	CCL20	-0.00579207	0.895576	0.0112891	0.176178
CXCL11	CCL20	-0.0559659	0.204365	-0.0475198	0.133167
CXCL12	CCL20	-0.0938783	0.0330033	-0.166987	0.00730746
CXCL13	CCL20	-0.0193396	0.661179	-0.0240859	0.14752
CXCL14	CCL20	-0.0249023	0.572491	-0.0122009	0.170938
CXCL16	CCL20	-0.114802	0.00905147	-0.183332	-0.0041779
CXCL17	CCL20	0.0623001	0.157618	-0.0731103	0.114475
XCL1	CCL20	0.0213744	0.628095	-0.0736146	0.104638
XCL2	CCL20	-0.00545786	0.901569	-0.0857181	0.0817651
DDX46	CCL20	-0.0376	0.394027	-0.154724	0.0277334
CCL22	CCL21	0.140255	0.00140284	0.133753	0.298982
CCL23	CCL21	0.0516413	0.241598	0.172955	0.345827
CCL24	CCL21	0.0438407	0.320256	0.195067	0.364623
CCL25	CCL21	0.0120941	0.784031	0.162747	0.329422
CCL26	CCL21	0.0972763	0.0271346	0.170405	0.349158
CCL28	CCL21	-0.0851075	0.0533484	-0.180548	-0.00176686
CX3CL1	CCL21	-0.0268968	0.542123	-0.0149828	0.169197
CXCL1	CCL21	0.0512318	0.245356	0.0775898	0.25703
CXCL2	CCL21	-0.0108937	0.805014	-0.0157837	0.154605
CXCL3	CCL21	0.0451243	0.306278	0.0918186	0.25411
CXCL5	CCL21	0.0206435	0.639896	0.0584241	0.234938
CXCL6	CCL21	0.0283849	0.519999	0.112762	0.28552
CXCL8	CCL21	0.0341821	0.438451	0.0907202	0.260314
CXCL9	CCL21	0.121382	0.0057659	0.234499	0.402444
CXCL10	CCL21	0.152039	0.000529323	0.204328	0.3691
CXCL11	CCL21	0.164339	0.000177158	0.225274	0.401109
CXCL12	CCL21	0.107535	0.0145298	0.312992	0.471904
CXCL13	CCL21	0.172145	8.48e-05	0.346235	0.491977
CXCL14	CCL21	-0.0472308	0.284226	0.0416024	0.215298
CXCL16	CCL21	-0.0777756	0.0775451	-0.0543231	0.118538
CXCL17	CCL21	-0.141411	0.00127901	-0.321776	-0.136699
XCL1	CCL21	-0.0107962	0.806725	0.0537499	0.229248
XCL2	CCL21	0.0733354	0.0961003	0.205667	0.373796
DDX46	CCL21	-0.0912616	0.0382315	-0.160135	0.0162912
CCL23	CCL22	0.0430671	0.328877	0.34613	0.504066
CCL24	CCL22	0.00833556	0.850178	0.122945	0.299252
CCL25	CCL22	-0.0131642	0.765459	-0.0538838	0.114733
CCL26	CCL22	0.0831294	0.0591571	-0.0123986	0.15599
CCL28	CCL22	0.0882693	0.0450546	0.0839258	0.264239
CX3CL1	CCL22	0.146841	0.000820875	0.424061	0.56939
CXCL1	CCL22	0.109415	0.0128874	0.0541665	0.221544
CXCL2	CCL22	0.0609733	0.166672	0.136918	0.302446
CXCL3	CCL22	0.0655307	0.137131	-0.015515	0.158894
CXCL5	CCL22	0.0699657	0.112421	-0.0881468	0.0886423
CXCL6	CCL22	-0.0453843	0.303497	-0.0609089	0.101186
CXCL8	CCL22	-0.0269125	0.541887	-0.115607	0.0543487
CXCL9	CCL22	-0.006013	0.891617	0.0738587	0.239619
CXCL10	CCL22	0.0159014	0.71858	0.0553995	0.221374
CXCL11	CCL22	0.00349671	0.936844	0.0895296	0.262932
CXCL12	CCL22	0.0764382	0.0827992	0.15517	0.329318
CXCL13	CCL22	0.0504504	0.25264	0.189915	0.341062
CXCL14	CCL22	0.0957664	0.0296212	0.29948	0.448735
CXCL16	CCL22	0.00679163	0.877686	0.102507	0.277336
CXCL17	CCL22	-0.0619234	0.16015	-0.0679257	0.109663
XCL1	CCL22	-0.102122	0.0203293	-0.158273	0.0223119
XCL2	CCL22	-0.021698	0.622899	-0.0336199	0.146465
DDX46	CCL22	0.0303138	0.492029	-0.0187085	0.157408
CCL24	CCL23	0.251996	6.46e-09	0.327806	0.481985
CCL25	CCL23	-0.0360572	0.413733	-0.10322	0.0718782
CCL26	CCL23	0.00437569	0.921014	-0.0862645	0.0892412
CCL28	CCL23	0.049969	0.257201	0.0662802	0.242547
CX3CL1	CCL23	0.0596972	0.175743	0.241454	0.404122
CXCL1	CCL23	0.0748718	0.0893151	0.0587801	0.226506
CXCL2	CCL23	0.164313	0.000177585	0.190077	0.355407
CXCL3	CCL23	0.199322	5.05e-06	0.127051	0.299594
CXCL5	CCL23	0.045911	0.297914	0.101218	0.277099
CXCL6	CCL23	0.0665649	0.131025	-0.024642	0.148034
CXCL8	CCL23	0.104685	0.0173713	-0.00783364	0.168625
CXCL9	CCL23	0.0402021	0.362101	0.00632266	0.18393
CXCL10	CCL23	0.0936156	0.0334991	0.059932	0.227967
CXCL11	CCL23	0.0162392	0.712863	0.0574577	0.231153
CXCL12	CCL23	0.151123	0.000572496	0.244403	0.40486
CXCL13	CCL23	0.0897585	0.0415407	0.105191	0.278932
CXCL14	CCL23	0.0149059	0.735518	0.149403	0.325287
CXCL16	CCL23	0.252359	6.14e-09	0.264221	0.432319
CXCL17	CCL23	-0.0470908	0.285658	-0.113162	0.0723951
XCL1	CCL23	-0.0758891	0.0850382	-0.0734788	0.105274
XCL2	CCL23	0.192817	1.03e-05	0.0581734	0.236021
DDX46	CCL23	-0.0332606	0.450903	-0.0275429	0.160748
CCL25	CCL24	-0.0186341	0.672809	-0.0256475	0.145389
CCL26	CCL24	0.128574	0.00343673	0.188258	0.341328
CCL28	CCL24	-0.03211	0.466725	-0.0456432	0.125747
CX3CL1	CCL24	-0.0600778	0.173	-0.0139543	0.153556
CXCL1	CCL24	0.0486147	0.270337	0.068825	0.243174
CXCL2	CCL24	0.000300689	0.994563	0.0783149	0.256927
CXCL3	CCL24	0.11893	0.00683807	0.166626	0.338415
CXCL5	CCL24	0.111039	0.0116023	0.19315	0.359868
CXCL6	CCL24	0.0206286	0.640138	0.108971	0.277895
CXCL8	CCL24	0.141466	0.00127339	0.190229	0.360858
CXCL9	CCL24	0.0766906	0.0817864	-0.00510153	0.184173
CXCL10	CCL24	0.141716	0.00124808	0.056008	0.239573
CXCL11	CCL24	0.0530053	0.229373	0.0157222	0.193904
CXCL12	CCL24	0.0916693	0.0373734	0.10819	0.273908
CXCL13	CCL24	0.0413138	0.348968	0.060629	0.223675
CXCL14	CCL24	-0.0394997	0.370554	-0.000792729	0.177656
CXCL16	CCL24	0.00584466	0.894633	-0.0250033	0.15572
CXCL17	CCL24	-0.134196	0.00225232	-0.311152	-0.134563
XCL1	CCL24	0.0140598	0.750016	-0.0126259	0.165229
XCL2	CCL24	0.185958	2.13e-05	0.0689075	0.242358
DDX46	CCL24	0.0219345	0.619113	-0.00900348	0.173869
CCL26	CCL25	0.0026315	0.952449	0.0819197	0.249074
CCL28	CCL25	0.0703176	0.11062	-0.111188	0.0661768
CX3CL1	CCL25	0.0218026	0.621223	-0.0509362	0.124239
CXCL1	CCL25	-0.0333532	0.449643	-0.0513069	0.126163
CXCL2	CCL25	-0.0490628	0.26594	-0.109974	0.0625756
CXCL3	CCL25	-0.0558955	0.204936	-0.0598391	0.116745
CXCL5	CCL25	-0.0401494	0.362731	-0.0536544	0.117474
CXCL6	CCL25	-0.0420737	0.340167	-0.00138337	0.171431
CXCL8	CCL25	-0.0432447	0.326885	-0.0192659	0.156104
CXCL9	CCL25	0.182211	3.13e-05	0.413548	0.553828
CXCL10	CCL25	0.14145	0.00127502	0.36282	0.507668
CXCL11	CCL25	0.10056	0.02234	0.353115	0.503627
CXCL12	CCL25	0.00283772	0.948728	0.131411	0.293192
CXCL13	CCL25	0.0799669	0.0695236	0.351492	0.500795
CXCL14	CCL25	-0.0331879	0.451893	-0.0526528	0.119847
CXCL16	CCL25	-0.0444962	0.313067	-0.226872	-0.0547175
CXCL17	CCL25	-0.00242805	0.956122	-0.155946	0.0147922
XCL1	CCL25	0.0692194	0.116314	0.199863	0.371673
XCL2	CCL25	0.103936	0.0181944	0.322536	0.472783
DDX46	CCL25	0.0121725	0.782666	-0.114959	0.0593359
CCL28	CCL26	-0.0264196	0.549315	-0.047059	0.131486
CX3CL1	CCL26	-0.0510083	0.247424	-0.133375	0.0352166
CXCL1	CCL26	0.0230529	0.601349	0.0983778	0.270781
CXCL2	CCL26	-0.0711806	0.106302	-0.158074	0.000897992
CXCL3	CCL26	-0.00971292	0.825789	0.0297252	0.195787
CXCL5	CCL26	0.089459	0.0422283	0.175717	0.34439
CXCL6	CCL26	0.0442606	0.315639	0.1437	0.310705
CXCL8	CCL26	0.109258	0.013018	0.30612	0.454292
CXCL9	CCL26	0.141938	0.00122599	0.163467	0.319136
CXCL10	CCL26	0.178738	4.44e-05	0.311554	0.460276
CXCL11	CCL26	0.148513	0.00071391	0.24643	0.396496
CXCL12	CCL26	0.0718063	0.103255	0.0483946	0.226633
CXCL13	CCL26	0.00511063	0.907803	0.0797501	0.248524
CXCL14	CCL26	-0.0547867	0.214078	-0.0788342	0.0901928
CXCL16	CCL26	-0.0915887	0.0375418	-0.321341	-0.170142
CXCL17	CCL26	-0.144692	0.000980178	-0.348956	-0.192035
XCL1	CCL26	0.0775917	0.078251	0.10904	0.270136
XCL2	CCL26	0.154102	0.00044299	0.0738144	0.243306
DDX46	CCL26	-0.0854593	0.0523669	-0.22451	-0.0610317
CX3CL1	CCL28	0.11322	0.0100559	0.232122	0.397146
CXCL1	CCL28	-0.0242161	0.583121	0.0313581	0.202802
CXCL2	CCL28	-0.0313931	0.476737	-0.076304	0.10542
CXCL3	CCL28	-0.0362435	0.411323	-0.0490304	0.123865
CXCL5	CCL28	-0.0382576	0.385802	-0.121328	0.0605443
CXCL6	CCL28	-0.00518764	0.90642	0.076409	0.251945
CXCL8	CCL28	-0.032348	0.463428	-0.0872232	0.0918297
CXCL9	CCL28	-0.0437721	0.321014	0.00199762	0.174555
CXCL10	CCL28	0.00130864	0.976343	0.0875258	0.258854
CXCL11	CCL28	0.0112623	0.798554	0.104739	0.267346
CXCL12	CCL28	0.0279499	0.526418	0.00305522	0.173789
CXCL13	CCL28	-0.0362604	0.411105	-0.0886229	0.0826544
CXCL14	CCL28	0.110655	0.0118953	0.0244196	0.197137
CXCL16	CCL28	0.0329121	0.455663	0.0036538	0.188516
CXCL17	CCL28	-0.00514065	0.907264	-0.0845049	0.0970546
XCL1	CCL28	-0.0249398	0.571912	0.00214988	0.185627
XCL2	CCL28	-0.0585707	0.184051	0.0157566	0.178507
DDX46	CCL28	0.0670466	0.128254	0.016564	0.180041
CXCL1	CX3CL1	0.111719	0.0110993	0.0882295	0.267461
CXCL2	CX3CL1	0.0728363	0.0983908	0.112203	0.279954
CXCL3	CX3CL1	-0.0361412	0.412646	-0.0379522	0.131889
CXCL5	CX3CL1	-0.0921086	0.0364673	-0.202747	-0.0263973
CXCL6	CX3CL1	0.0701306	0.111574	0.0822435	0.252438
CXCL8	CX3CL1	-0.0299904	0.496662	-0.0864492	0.0807235
CXCL9	CX3CL1	0.0399343	0.36531	0.0511765	0.219129
CXCL10	CX3CL1	0.0901654	0.0406218	0.0490199	0.222855
CXCL11	CX3CL1	0.102401	0.0199875	0.108373	0.274047
CXCL12	CX3CL1	0.0861511	0.0504805	0.111795	0.286829
CXCL13	CX3CL1	-0.00349593	0.936858	0.0198278	0.184491
CXCL14	CX3CL1	0.137215	0.00178309	0.193389	0.35818
CXCL16	CX3CL1	-0.00707449	0.872634	0.0505491	0.228197
CXCL17	CX3CL1	-0.0561508	0.202871	-0.0165638	0.166895
XCL1	CX3CL1	-0.109248	0.0130263	-0.131031	0.0468806
XCL2	CX3CL1	-0.0101344	0.818358	-0.0255186	0.151052
DDX46	CX3CL1	-0.0101743	0.817657	-0.0150468	0.160813
CXCL2	CXCL1	0.474623	2.39e-30	0.399029	0.545591
CXCL3	CXCL1	0.522626	1.66e-37	0.54914	0.667761
CXCL5	CXCL1	0.0891996	0.0428314	0.172699	0.337105
CXCL6	CXCL1	0.486244	5.6e-32	0.49347	0.628472
CXCL8	CXCL1	0.498114	1.04e-33	0.570982	0.684404
CXCL9	CXCL1	0.00160792	0.970934	-0.0334106	0.138243
CXCL10	CXCL1	0.0603613	0.170978	0.0446592	0.215364
CXCL11	CXCL1	0.0884901	0.0445184	0.024253	0.199371
CXCL12	CXCL1	-0.00482056	0.913014	-0.00210849	0.171123
CXCL13	CXCL1	0.0214551	0.626796	0.0215532	0.187393
CXCL14	CXCL1	-0.0521347	0.237125	-0.0623197	0.115675
CXCL16	CXCL1	-0.0336929	0.445037	-0.141389	0.0312632
CXCL17	CXCL1	-0.0384375	0.38357	-0.119423	0.0512421
XCL1	CXCL1	0.00176689	0.968062	-0.0487995	0.140991
XCL2	CXCL1	0.0327158	0.458356	-0.0361117	0.148156
DDX46	CXCL1	-0.0770679	0.0802905	-0.173553	0.00582254
CXCL3	CXCL2	0.714818	7.1e-82	0.668471	0.764823
CXCL5	CXCL2	-0.00919912	0.834869	0.0908954	0.263954
CXCL6	CXCL2	0.0861907	0.0503743	-0.0166996	0.149093
CXCL8	CXCL2	0.346023	5.85e-16	0.252621	0.409115
CXCL9	CXCL2	-0.0782329	0.0758118	-0.162559	0.0199249
CXCL10	CXCL2	-0.0440806	0.317613	-0.11218	0.0563517
CXCL11	CXCL2	-0.0508343	0.249042	-0.118979	0.0516088
CXCL12	CXCL2	-0.0465618	0.29111	-0.138669	0.0396629
CXCL13	CXCL2	0.0236686	0.59167	-0.045564	0.132776
CXCL14	CXCL2	-0.0347313	0.431125	-0.00533802	0.170303
CXCL16	CXCL2	0.0492077	0.26453	0.0171526	0.183366
CXCL17	CXCL2	-0.0360635	0.413651	-0.0401559	0.145411
XCL1	CXCL2	-0.0230324	0.601673	-0.0955403	0.0767364
XCL2	CXCL2	0.0593614	0.17819	-0.00102509	0.184054
DDX46	CXCL2	0.00581868	0.895099	-0.103797	0.0717129
CXCL5	CXCL3	0.17132	9.19e-05	0.321491	0.472642
CXCL6	CXCL3	0.102027	0.0204477	0.103685	0.273065
CXCL8	CXCL3	0.489926	1.65e-32	0.454133	0.58476
CXCL9	CXCL3	-0.0451107	0.306425	-0.103392	0.0716389
CXCL10	CXCL3	-0.00826041	0.851513	-0.0178946	0.161543
CXCL11	CXCL3	0.011006	0.803044	-0.0235498	0.147478
CXCL12	CXCL3	0.00375884	0.93212	-0.07594	0.0959703
CXCL13	CXCL3	-0.0231658	0.59957	-0.0843154	0.0923272
CXCL14	CXCL3	-0.0837615	0.0572464	-0.0802467	0.0996598
CXCL16	CXCL3	0.0809505	0.0661512	-0.00446592	0.166132
CXCL17	CXCL3	-0.0911436	0.0384829	-0.218497	-0.0535205
XCL1	CXCL3	-0.0156164	0.723415	-0.0528751	0.133813
XCL2	CXCL3	0.0611274	0.165601	0.0193322	0.192519
DDX46	CXCL3	-0.0265959	0.546652	-0.122659	0.0526137
CXCL6	CXCL5	0.0282866	0.521446	0.14956	0.312162
CXCL8	CXCL5	0.252257	6.23e-09	0.368232	0.516904
CXCL9	CXCL5	-0.0229398	0.603135	-0.181641	-0.00593853
CXCL10	CXCL5	0.044165	0.316686	-0.0480253	0.119464
CXCL11	CXCL5	0.0768839	0.0810173	-0.0658684	0.107837
CXCL12	CXCL5	-0.0111945	0.799743	-0.0161283	0.159435
CXCL13	CXCL5	-0.040586	0.357531	-0.136487	0.0280331
CXCL14	CXCL5	-0.0517744	0.240385	-0.129803	0.0501833
CXCL16	CXCL5	-0.0658124	0.135447	-0.0839053	0.0986674
CXCL17	CXCL5	-0.128062	0.00356885	-0.302971	-0.136776
XCL1	CXCL5	0.0144911	0.742614	-0.0541818	0.123735
XCL2	CXCL5	0.0210403	0.633478	-0.0854019	0.0905585
DDX46	CXCL5	-0.0144767	0.742861	-0.0996042	0.0792331
CXCL8	CXCL6	0.326803	2.62e-14	0.387025	0.537806
CXCL9	CXCL6	0.0233326	0.596943	0.0283993	0.209945
CXCL10	CXCL6	0.0789241	0.0732521	0.131365	0.289845
CXCL11	CXCL6	0.0688763	0.118139	0.129252	0.292671
CXCL12	CXCL6	0.131994	0.00266279	0.133016	0.2916
CXCL13	CXCL6	0.0210315	0.63362	0.0815065	0.268744
CXCL14	CXCL6	-0.0388265	0.378771	-0.0556222	0.117283
CXCL16	CXCL6	-0.0850395	0.0535399	-0.228631	-0.0603972
CXCL17	CXCL6	-0.0182103	0.679834	-0.134337	0.0290238
XCL1	CXCL6	0.00492886	0.911068	0.0510322	0.208613
XCL2	CXCL6	-0.0107054	0.808318	-0.0154997	0.164274
DDX46	CXCL6	-0.0713352	0.105543	-0.193256	-0.0171046
CXCL9	CXCL8	-0.0341917	0.438322	-0.0926685	0.0895028
CXCL10	CXCL8	0.0967653	0.0279552	0.118816	0.278004
CXCL11	CXCL8	0.0559207	0.204732	0.0271802	0.201492
CXCL12	CXCL8	0.0498666	0.258178	-0.00623136	0.170097
CXCL13	CXCL8	-0.0248079	0.573948	-0.0726249	0.0947443
CXCL14	CXCL8	-0.086435	0.0497233	-0.164131	0.00649294
CXCL16	CXCL8	-0.113043	0.0101742	-0.247348	-0.0824074
CXCL17	CXCL8	-0.127158	0.00381324	-0.293117	-0.123489
XCL1	CXCL8	0.0233998	0.595886	-0.0349939	0.143878
XCL2	CXCL8	0.0686921	0.119129	-0.0483546	0.127608
DDX46	CXCL8	-0.0688739	0.118152	-0.131515	0.0421777
CXCL10	CXCL9	0.773688	6e-104	0.862313	0.903785
CXCL11	CXCL9	0.654696	1.81e-64	0.835026	0.883573
CXCL12	CXCL9	0.14513	0.000945541	0.21284	0.37582
CXCL13	CXCL9	0.244707	1.79e-08	0.553236	0.669436
CXCL14	CXCL9	-0.0321771	0.465794	-0.0355913	0.140227
CXCL16	CXCL9	-0.0393208	0.372728	-0.162684	0.00648522
CXCL17	CXCL9	-0.0315785	0.474136	-0.235507	-0.0615872
XCL1	CXCL9	0.240281	3.27e-08	0.403571	0.549882
XCL2	CXCL9	0.45396	1.34e-27	0.581019	0.689966
DDX46	CXCL9	0.0920206	0.0366473	0.00167651	0.176253
CXCL11	CXCL10	0.786798	8.57e-110	0.92597	0.949937
CXCL12	CXCL10	0.121132	0.0058681	0.191688	0.349268
CXCL13	CXCL10	0.22913	1.42e-07	0.436887	0.567341
CXCL14	CXCL10	-0.0688687	0.11818	-0.0354778	0.130654
CXCL16	CXCL10	-0.077675	0.0779305	-0.199656	-0.0314695
CXCL17	CXCL10	-0.0641035	0.145914	-0.272979	-0.102143
XCL1	CXCL10	0.253011	5.59e-09	0.422308	0.573935
XCL2	CXCL10	0.48018	4.05e-31	0.573901	0.68157
DDX46	CXCL10	0.0346892	0.431684	-0.0377778	0.140424
CXCL12	CXCL11	0.0945055	0.031845	0.199837	0.362197
CXCL13	CXCL11	0.155761	0.000383278	0.445095	0.584707
CXCL14	CXCL11	-0.0328652	0.456305	-0.0192222	0.15618
CXCL16	CXCL11	-0.0279417	0.526539	-0.143449	0.0349854
CXCL17	CXCL11	-0.0974554	0.0268518	-0.262781	-0.0864768
XCL1	CXCL11	0.138132	0.00165948	0.404405	0.557133
XCL2	CXCL11	0.257839	2.79e-09	0.537879	0.660555
DDX46	CXCL11	0.0477009	0.279456	-0.0872497	0.107079
CXCL13	CXCL12	0.218294	5.52e-07	0.23735	0.394244
CXCL14	CXCL12	0.0246833	0.575874	0.0706669	0.232349
CXCL16	CXCL12	0.0886264	0.0441901	0.0703996	0.24831
CXCL17	CXCL12	-0.122078	0.00549046	-0.168983	0.00378343
XCL1	CXCL12	-0.0321752	0.46582	0.0374218	0.218957
XCL2	CXCL12	0.112168	0.010777	0.141801	0.303831
DDX46	CXCL12	0.0760158	0.0845172	0.0353656	0.199312
CXCL14	CXCL13	-0.00735285	0.867668	0.113409	0.277169
CXCL16	CXCL13	-0.0696167	0.114228	-0.172127	-0.00220837
CXCL17	CXCL13	0.0029904	0.945973	-0.120788	0.0645036
XCL1	CXCL13	0.160032	0.000262271	0.281753	0.442506
XCL2	CXCL13	0.252752	5.8e-09	0.400014	0.537607
DDX46	CXCL13	-0.0764303	0.0828313	-0.1791	-0.00396964
CXCL16	CXCL14	0.0200341	0.649809	0.0561552	0.221316
CXCL17	CXCL14	0.104418	0.0176612	0.0894478	0.264816
XCL1	CXCL14	-0.0888729	0.0436015	-0.124019	0.0570423
XCL2	CXCL14	-0.0798017	0.070104	-0.0793029	0.0863393
DDX46	CXCL14	-0.0265956	0.546657	-0.173399	0.0125333
CXCL17	CXCL16	0.0819527	0.0628539	0.0138035	0.19065
XCL1	CXCL16	-0.0810837	0.0657049	-0.202782	-0.00640002
XCL2	CXCL16	-0.00826938	0.851353	-0.122673	0.0540628
DDX46	CXCL16	0.125677	0.0042463	0.0417806	0.222752
XCL1	CXCL17	-0.0430608	0.328949	-0.231765	-0.0603154
XCL2	CXCL17	-0.0758796	0.0850775	-0.226458	-0.0501134
DDX46	CXCL17	-0.117095	0.00775376	-0.20769	-0.0274578
XCL2	XCL1	0.36187	2.07e-17	0.581495	0.695147
DDX46	XCL1	0.0061852	0.888532	-0.0978632	0.0844932
DDX46	XCL2	-0.109971	0.0124337	-0.135325	0.0449211
